1 ***Bacillus* endospore appendages form a novel family of disulfide-linked pili**

2

3 Brajabandhu Pradhan<sup>1,2,§</sup>, Janine Liedtke<sup>3,§</sup>, Mike Sleutel<sup>1,2,§</sup>, Toril Lindbäck<sup>3</sup>, Ann-Katrin  
4 Llarena<sup>3</sup>, Ola Brynildsrud<sup>3,4</sup>, Marina Aspholm<sup>3\*</sup>, Han Remaut<sup>1,2\*</sup>

5 1. Structural and Molecular Microbiology, VIB-VUB Center for Structural Biology, VIB,  
6 1050 Brussels, Belgium.

7 2. Department of Bioengineering Sciences, Structural Biology Brussels, Vrije Universiteit  
8 Brussel, 1050 Brussels, Belgium.

9 3. Department of Paraclinical Sciences, Faculty of Veterinary Medicine, the Norwegian  
10 University of Life Sciences, PO Box 369 Sentrum, N-0102, Oslo, Norway

11 4. Division of Infection Control and Environmental Health, Norwegian Institute of Public  
12 Health, P.O. Box 222 Skøyen, 0213 Oslo, Norway

13

14 <sup>§</sup> These authors contributed equally

15 \*Correspondence: [han.remaut@vub.be](mailto:han.remaut@vub.be) and [marina.aspholm@nmbu.no](mailto:marina.aspholm@nmbu.no)

16

17

18 **Summary**

19 *Bacillus cereus sensu lato* is a group of Gram-positive endospore-forming bacteria with high  
20 ecological diversity. Their endospores are decorated with micrometer-long appendages of  
21 unknown identity and function. Here we isolate endospore appendages (Enas) from the  
22 food poisoning outbreak strain *B. cereus* NVH 0075-95 and find proteinaceous fibers of two  
23 main morphologies. By using cryo-EM and 3D helical reconstruction we show that *Bacillus*  
24 Enas form a novel class of Gram-positive pili. Enas consist of single domain subunits with  
25 jellyroll topology that are laterally stacked by  $\beta$ -sheet augmentation. Enas are longitudinally  
26 stabilized by disulfide bonding through N-terminal connector peptides that bridge the  
27 helical turns. Together, this results in flexible pili that are highly resistant to heat, drought  
28 and chemical damage. Phylogenomic analysis reveals the presence of defined *ena* clades  
29 amongst different eco- and pathotypes. We propose Enas to represent a novel class of pili  
30 specifically adapted to the harsh conditions encountered by bacterial spores.

31 **Keywords**

32 Endospore; pilus; *Bacillus*; self-assembly; protein nanofiber.

33

34 **Introduction**

35 When faced with adverse growth conditions, bacteria belonging to the phylum *Firmicutes*  
36 can differentiate into the metabolically dormant endospore state. These endospores exhibit  
37 extreme resilience towards environmental stressors due to their dehydrated state and  
38 unique multilayered cellular structure, and can germinate into the metabolically active and  
39 replicating vegetative growth state even hundreds of years after their formation (Setlow,  
40 2014). In this way, Firmicutes belonging to the classes Bacilli and Clostridia can withstand  
41 long periods of drought, starvation, high oxygen or antibiotic stress.

42 Endospores typically consist of an innermost dehydrated core which contains the bacterial  
43 DNA. The core is enclosed by an inner membrane surrounded by a thin layer of  
44 peptidoglycan that will become the cell wall of the vegetative cell that emerges during  
45 endospore germination. Then follows a thick cortex layer of modified peptidoglycan that is  
46 essential for dormancy. The cortex layer is in turn surrounded by several proteinaceous coat  
47 layers (Atrih and Foster, 1999). In some *Clostridium* and most *Bacillus cereus* group species,  
48 the spore is enclosed by an outermost loose-fitting paracrystalline exosporium layer  
49 consisting of (glyco)proteins and lipids (Stewart, 2015). The surface of *Bacillus* and  
50 *Clostridium* endospores can also be decorated with multiple micrometers long and a few  
51 nanometers wide filamentous appendages, which show a great structural diversity between  
52 strains and species (Hachisuka and Kuno, 1976; Rode et al., 1971; Walker et al., 2007).  
53 Spores of species belonging to the *B. cereus* group are often covered with appendages  
54 which morphologically resemble pili of Gram-negative and Gram-positive bacteria when  
55 imaged by negative strain TEM (Ankolekar and Labbe, 2010; Smirnova et al., 2013). The  
56 endospore appendages, hereafter called Enas, vary in number and morphology between *B.*  
57 *cereus* group strains and species, and some strains even simultaneously express Enas of  
58 different morphologies (Smirnova et al., 2013). Structures resembling the Enas have not  
59 been observed on the surface of the vegetative cells suggesting that they may represent  
60 spore-specific fibers.

61 Although the presence of endospore appendages in species belonging to the *B. cereus* group  
62 was reported already in the '60s, efforts to characterize their composition and genetic  
63 identity have failed due to difficulties to solubilize and enzymatically digest the fibers  
64 (DesRosier and Lara, 1981; Gerhardt and Ribj, 1964). Therefore, there is no genetic or  
65 structural information and very limited functional data available for endospore appendages.

66 Here we isolate Enas from the food poisoning outbreak strain *B. cereus* NVH 0075-95 and  
67 find proteinaceous fibers of two main morphologies. By using cryo-EM and 3D helical  
68 reconstruction we show that the major form of Enas represents a novel class of Gram-  
69 positive pili. A unique architecture of subunit stabilization by lateral  $\beta$ -augmentation and  
70 longitudinal disulfide crosslinking gives rise to pili that combine high flexibility with high  
71 resistance to heat, drought and chemical damage. The genetic identity of the S-type Enas  
72 was deduced from the structural model and confirmed by analysis of mutants lacking genes  
73 encoding potential Ena protein subunits. S-type Ena fibers are encoded by three associated  
74 genes which are present in most species of the *B. cereus* group. Remarkably, recombinant  
75 Ena subunits spontaneously self-assemble *in vitro* and *in vivo* into protein nanofibers with  
76 native Ena-like properties and structure.

77

## 78 **Results**

### 79 ***Bacillus cereus* NVH 0075-95 show endospore appendages of two morphological types**

80 Negative stain EM imaging of *B. cereus* strain NVH 0075-95 showed typical endospores with  
81 a dense core of  $\sim 1$   $\mu\text{m}$  diameter, tightly wrapped by an exosporium layer that on TEM  
82 images emanates as a flat 2-3  $\mu\text{m}$  long saclike structure from the endospore body (Figure  
83 1A). The endospores showed an abundance of micrometer-long appendages (Enas) (Figure  
84 1A). The average endospore counted 20 - 30 Enas ranging from 200 nm to 6  $\mu\text{m}$  in length  
85 (Figure 1E), with a median length of approximately 600 nm. The density of Enas appeared  
86 highest at the pole of the spore body that lies near the exosporium. There, Enas seem to  
87 emerge from the exosporium as individual fibers or as a bundle of individual fibers that  
88 separates a few tens of nanometers above the endospore surface (Figures 1B and S1B).  
89 Closer inspection revealed that the Enas showed two distinct morphologies (Figure 1 C, D).  
90 The main or "staggered-type" (S-type) morphology represents approximately 90% of the

91 observed fibers. S-type Enas have a width of  $\sim 110$  Å and give a polar, staggered appearance  
92 in negative stain 2D classes, with alternating scales pointing down to the spore surface. At  
93 the distal end, S-type Enas terminate in multiple filamentous extensions or “ruffles” of 50 -  
94 100 nm in length and  $\sim 35$  Å thick (Figure 1C). The minor or “Ladder-like” (L-type) Ena  
95 morphology is thinner,  $\sim 80$  Å in width, and terminates in a single filamentous extension with  
96 dimensions similar to ruffles seen in S-type fibers (Figure 1D). L-type Enas lack the scaled,  
97 staggered appearance of the S-type Enas, instead showing a ladder of stacked disk-like units  
98 of  $\sim 40$  Å height. Whereas S-type Enas can be seen to traverse the exosporium and connect  
99 to the spore body, L-type Enas appear to emerge from the exosporium (Figure S1A). Both  
100 Ena morphologies co-exist on individual endospores (Figure S1C). Neither Ena morphology is  
101 reminiscent of sortase-mediated or type IV pili previously observed in Gram-positive  
102 bacteria (Mandlik et al., 2008; Melville and Craig, 2013). In an attempt to identify their  
103 composition, shear force extracted and purified Enas were subjected to trypsin digestion for  
104 identification by mass spectrometry. However, despite the good enrichment of both S- and  
105 L-type Enas, no unambiguous candidates for Ena were identified amongst the tryptic  
106 peptides, which largely contained contaminating mother cell proteins, EA1 S-layer and spore  
107 coat proteins. Attempts to resolve the Ena monomers by SDS-PAGE were unsuccessful,  
108 including strong reducing conditions (up to 200 mM  $\beta$ -mercaptoethanol), heat treatment  
109 (100 °C), limited acid hydrolysis (1h 1M HCl), or incubation with chaotropes such as 8M urea  
110 or 6M guanidinium chloride. Ena fibers also retained their structural properties upon  
111 autoclaving, desiccation or treatment with proteinase K (Figure S1C).

### 112 **Cryo-EM of endospore appendages identifies their molecular identity**

113 To further study the nature of the Enas, fibers purified from *B. cereus* NVH 0075-95  
114 endospores were imaged by cryogenic electron microscopy (cryo-EM) and analyzed using 3D  
115 reconstruction. Isolated fibers showed a 9.4:1 ratio of S- and L-type Enas, similar to what  
116 was seen on endospores. Boxes with a dimension of 300 x 300 pixels ( $246 \times 246$  Å<sup>2</sup>) were  
117 extracted along the length of the fibers, with an inter-box overlap of 21 Å, and subjected to  
118 2D classification using RELION 3.0 (Zivanov et al., 2018). Power spectra of the 2D class  
119 averages revealed a well-ordered helical symmetry for S-type Enas (Figure 2A, B), whereas L-  
120 type Enas primarily showed translational symmetry (Figure 1D). Based on a helix radius of  
121 approximately 54.5 Å, we estimated layer lines Z' and Z'' in the power spectrum of S-type

122 Enas to have a Bessel order of -11 and 1, respectively (Figure 2A, B). In the 2D classes  
123 holding the majority of extracted boxes the Bessel order 1 layer line was found at a distance  
124 of  $0.02673 \text{ \AA}^{-1}$  from the equator, corresponding to a pitch of  $37.4 \text{ \AA}$ , in good agreement with  
125 spacing of the apparent 'lobes' seen also by negative stain (Figures 1C, 2B and S1). The  
126 correct helical parameters were derived by an empirical approach in which a systematic  
127 series of starting values for subunit rise and twist were used for 3D reconstruction and real  
128 space Bayesian refinement using RELION 3.0 (He and Scheres, 2017). Based on the  
129 estimated Fourier – Bessel indexing, input rise and twist were varied in the range of  $3.05 -$   
130  $3.65 \text{ \AA}$  and  $29 - 35$  degrees, respectively, with a sampling resolution of  $0.1 \text{ \AA}$  and 1 degree  
131 between tested start values. This approach converged on a unique set of helical parameters  
132 that resulted in 3D maps with clear secondary structure and identifiable densities for  
133 subunit side chains (Figure 2C). The reconstructed map corresponds to a left-handed 1-start  
134 helix with a rise and twist of  $3.22937 \text{ \AA}$  and  $31.0338$  degrees per subunit, corresponding to a  
135 helix with 11.6 units per turn (Figure 2D). After refinement and postprocessing in RELION  
136 3.0, the map was found to be of resolution  $3.2 \text{ \AA}$  according to the  $FSC_{0.143}$  criterion.

137 The resulting map showed well defined subunits comprising an 8-stranded  $\beta$ -  
138 sandwich domain of approximately 100 residues (Figure 2E). The side chain density was of  
139 sufficient quality to manually deduce a short motif with the sequence F-C-M-V/T-I-R-Y  
140 (Figure S2A). A search of the *B. cereus* NVH 0075-95 proteome (GCA\_001044825.1)  
141 identified two hypothetical proteins of unknown function, namely KMP91697.1 and  
142 KMP91698.1, encoded by TU63\_02435 and TU63\_02440 respectively (Figure S2B). Further  
143 inspection of the electron potential map and manual model building of the Ena subunit  
144 showed this to fit well with the protein KMP91698.1. TU\_63\_02440 is located 15 bp  
145 downstream of the TU63\_02435 locus. Both genes encode hypothetical proteins of similar  
146 size (117 and 126 amino acids and estimated molecular weights of 12 and 14 kDa, for  
147 KMP91698.1 and KMP91697.1, respectively), with 39% pairwise amino acid sequence  
148 identity, a shared domain of unknown function (DUF) 3992 and similar Cys patterns (Figure  
149 S2B). Further downstream of TU\_63\_02440, on the minus strand, the locus TU63\_0245  
150 encodes a third DUF3992 containing hypothetical protein (KMP91699.1), of 160 amino acids  
151 and an estimated molecular weight of 17 kDa. As such, KMP91697.1, KMP91698.1 and

152 KMP91699.1 are regarded as candidate Ena subunits, hereafter dubbed Ena1A, Ena1B and  
153 Ena1C, respectively (Figure S2B,C).

154

### 155 **Ena1B self-assembles into endospore appendage-like nanofibers *in vitro***

156 To confirm the subunit identity of the endospore appendages isolated from *B. cereus*  
157 NVH0075-95, we cloned a synthetic gene fragment corresponding to the coding sequence of  
158 Ena1B and an N-terminal TEV protease cleavable 6xHis-tag into a vector for recombinant  
159 expression in the cytoplasm of *E. coli*. The recombinant protein was found to form inclusion  
160 bodies, which were solubilized in 8M urea before affinity purification. Removal of the  
161 chaotropic agent by rapid dilution resulted in the formation of abundant soluble crescent-  
162 shaped oligomers reminiscent of a partial helical turn seen in the isolated S-type Enas  
163 (Figure S2A-E), suggesting the refolded recombinant Ena1B (*recEna1B*) adopts the native  
164 subunit-subunit  $\beta$ -augmentation contacts (Figure S2E). We reasoned that *recEna1B* self-  
165 assemble into helical appendages arrested at the level of a single turn due to steric  
166 hindrance by the 6xHis-tag at the subunits N-terminus. Indeed, proteolytic removal of the  
167 affinity tag readily resulted in the formation of fibers of 110 Å diameter and with helical  
168 parameters similar to S-type Enas, though lacking the distal ruffles seen in *ex vivo* fibers  
169 (Figure S2F). CryoEM data collection and 3D helical reconstruction was performed to assess  
170 whether *in vitro recEna1B* nanofibers were isomorphous with *ex vivo* S-type Enas. Real  
171 space refinement of helical parameters using RELION 3.0 converged on a subunit rise and  
172 twist of 3.43721 Å and 32.3504 degrees, respectively, approximately 0.2 Å and 1.3 degrees  
173 higher than found in *ex vivo* S-type Enas, and corresponding to a left-handed helix with a  
174 pitch of 38.3 Å and 11.1 subunits per turn. Apart from the minor differences in helical  
175 parameters the 3D reconstruction map of *in vitro* Ena1B fibers (estimated resolution of 3.2  
176 Å; Figure S3A, B) was near isomorphous to *ex vivo* S-type Enas in terms of size and  
177 connectivity of the fiber subunits (Figure S3D). Closer inspection of the 3D cryoEM maps for  
178 *recEna1B* and *ex vivo* S-type Ena showed an improved side chain fit for Ena1B residues in the  
179 former (Figure S3B, C, D) and revealed regions in the *ex vivo* Ena maps that showed partial  
180 side-chain character of Ena1A, particularly in loop L1, L3, L5 and L7 (Figure S2B, S3B,C).  
181 Although the Ena1B character of the *ex vivo* maps is dominant, this suggested that *ex vivo* S-  
182 type Enas consist of a mixed population of Ena1A and Ena1B fibers, or that S-type Enas have

183 a mixed composition comprising both Ena1A and Ena1B. Immunogold labelling using sera  
184 generated with *recEna1A* or *recEna1B* showed subunits-specific labeling within single Enas,  
185 confirming these have a mixed composition of Ena1A and Ena1B (Figure S3E). No staining of  
186 S-type Enas was seen with Ena1C serum (Figure S3E). No systematic patterning or molar  
187 ratio for Ena1A and Ena1B could be discerned from immunogold labelling or helical  
188 reconstructions with an asymmetric unit containing more than one subunit, suggesting the  
189 distribution of Ena1A and Ena1B in the fibers to be random. Apart from some side chain  
190 densities with mixed Ena1A and Ena1B character, the cryoEM electron potential maps of the  
191 *ex vivo* Enas showed a unique main chain conformation, indicating the Ena1A and Ena1B  
192 have near isomorphous folds.

193

#### 194 **Enas represent a novel family of Gram-positive pili**

195 Upon recognizing that native S-type Enas show a mixed Ena1A and Ena1B  
196 composition, we continued with 3D cryoEM reconstruction of *recEna1B* for model building.  
197 The Ena subunit consists of a typical jellyroll fold (Richardson, 1981) comprised of two  
198 juxtaposed  $\beta$ -sheets consisting of strands BIDG and CHEF (Figure 2F). The jellyroll domain is  
199 preceded by a flexible 15 residue N-terminal extension hereafter referred to as N-terminal  
200 connector ('Ntc'). Subunits align side by side through a staggered  $\beta$ -sheet augmentation  
201 (Remaut and Waksman, 2006), where the sheet composed of strands BIDG of a subunit *i* is  
202 augmented with strands CHEF of the preceding subunit *i-1*, and strands CHEF of subunit *i* are  
203 augmented with strands BIDG of the next subunit in row *i+1* (Figure 2F, Figure S4A, B). As  
204 such, the packing in the endospore appendages can be regarded as a slanted  $\beta$ -propeller of  
205 8-stranded  $\beta$ -sheets, with 11.6 blades per helical turn and an axial rise of 3.2 Å per subunit  
206 (Figure 2E). Subunit-subunit contacts in the  $\beta$ -propeller are further stabilized by two  
207 complementary electrostatic patches on the Ena subunits (Figure S4C). In addition to these  
208 lateral contacts, subunits across helical turns are also connected through the Ntc's. The Ntc  
209 of each subunit *i* makes disulfide bond contacts with subunits *i-9* and *i-10* in the preceding  
210 helical turn (Figure 2F, Figure S4B). These contacts are made through disulfide bonding of  
211 Cys 10 and Cys 11 in subunit *i*, with Cys 109 and Cys 24 in the strands I and B of subunits *i-9*  
212 and *i-10*, respectively (Figure 2F, S4B). Thus, disulfide bonding via the Ntc results in a  
213 longitudinal stabilization of fibers by bridging the helical turns, as well as in a further lateral

214 stabilization in the  $\beta$ -propellers by covalent cross-linking of adjacent subunits. The Ntc  
215 contacts lie on the luminal side of the helix, leaving a central void of approximately 1.2 nm  
216 diameter (Figure S4D). Residues 12-17 form a flexible spacer region between the Ena  
217 jellyroll domain and the Ntc. Strikingly, this spacer region creates a 4.5 Å longitudinal gap  
218 between the Ena subunits, which are not in direct contact other than through the Ntc  
219 (Figure 3C, S2B). The flexibility in the Ntc spacer and the lack of direct longitudinal protein-  
220 protein contact of subunits across the helical turns create a large flexibility and elasticity in  
221 the Ena fibers (Figure 3). 2D class averages of endospore-associated fibers show longitudinal  
222 stretching, with a change in pitch of up to 8 Å (range: 37.1 – 44.9 Å; Figure 3D), and an axial  
223 rocking of up to 10 degrees per helical turn (Figure 3A, B).

224 Thus, *B. cereus* endospore appendages represent a novel class of bacterial pili,  
225 comprising a left-handed single start helix with non-covalent lateral subunit contacts formed  
226 by  $\beta$ -sheet augmentation, and covalent longitudinal contacts between helical turns by  
227 disulfide bonded N-terminal connector peptides, resulting in an architecture that combines  
228 extreme chemical stability (Figure S1) with high fiber flexibility.

229

### 230 **The *ena1* coding region for S-type Enas**

231 In *B. cereus* NVH 0075-95 *Ena1A*, *Ena1B* and *Ena1C* are encoded in a genomic region flanked  
232 upstream by *dedA* (genbank protein-id: KMP91696.1) and a gene encoding a 93-residue  
233 protein of unknown function (DUF1232, genbank: KMP91695.1) (Figure 4A). Downstream,  
234 the *ena*-gene cluster is flanked by a gene encoding an acid phosphatase (TU63\_02450).  
235 Within the *ena*-gene cluster, *ena1A* and *ena1B* are found in forward, and *ena1C* in reverse  
236 orientation, respectively (Figure 4A). PCR analysis of NVH 0075-95 cDNA made from mRNA  
237 isolated after 4 and 16 h of culture, representative for vegetative growth and sporulating  
238 cells, respectively, indicated that *ena1A* and *ena1B* are co-expressed from a bicistronic  
239 transcript during sporulation but not during vegetative growth (Figure 4B). A weak  
240 amplification signal was observed in vegetative cells when the forward primer was located  
241 in *dedA* upstream of *ena1A* and the reverse primer was located within *ena1B* (Figure 4B,  
242 lane 2) suggesting that some *enaA* and *enaB* is coexpressed with *dedA*. This was observed in  
243 vegetative cells or very early in sporulation but not during later sporulation stages and may



244 represent a fraction of improperly terminated *dedA* mRNA. Reverse transcription  
245 quantitative PCR (RT-qPCR) analysis showed increased expression of *ena1A*, *ena1B* and  
246 *ena1C* in sporulating cells compared to vegetative cells (Figure 4B). CryoEM maps and  
247 immuno-gold TEM analysis of *ex vivo* S-type Enas indicated these contain both Ena1A and  
248 Ena1B (Figure S3B-D). To determine the relative contribution of Ena1 subunits to *B. cereus*  
249 Enas we made individual chromosomal knockouts of *ena1A*, *ena1B*, as well as *ena1C* in  
250 strain NVH 0075-95 and investigated their respective endospores by TEM. All *ena1* mutants  
251 made endospores of similar dimensions to WT and with intact exosporium (Figure 5A, Figure  
252 S5). Both the *ena1A* and *ena1B* mutant resulted in endospores completely lacking S-type  
253 Enas, in agreement with the mixed content of *ex vivo* fibers. The *ena1C* mutant also resulted  
254 in the loss of S-type Ena on the endospores (Figure 5A), even though staining with anti-  
255 Ena1C serum did not identify the presence of the protein inside S-type Enas (Figure S3D). All  
256 three mutants still showed the presence of L-type Enas, of similar size and number density  
257 as WT endospores, although statistical analysis does not rule out L-type Enas to have a slight  
258 increase in length in the *ena1B* and *ena1C* mutants (length  $p=0.003$  and  $<0.0001$ , resp.)  
259 (Figure 5B). Thus, Ena1A, Ena1B and Ena1C are mutually required for *in vivo* S-type Ena  
260 assembly, but not for L-type Ena assembly. Complementation of the *ena1B* mutant with a  
261 low copy plasmid (pMAD-I-Scel) containing *ena1A-ena1B* restored S-type Ena expression.  
262 Plasmid-based expression of these subunits resulted in an average ~2-fold increase in the  
263 number of S-type Enas per spore, and a drastic increase in Ena length, now reaching several  
264 microns (Figure 5A, B, Figures S5D). Thus, the number and length of S-type Enas depend on  
265 the concentration of available Ena1A and Ena1B subunits. Notably, several endospores  
266 overexpressing Ena1A and Ena1B appeared to lack an exosporium or showed the  
267 entrapment of S-type Enas inside the exosporium (Figure S5C, D). This demonstrates that S-  
268 type Enas emanate from the spore body, and that a disbalance in the concentration or  
269 timing of *ena* expression can result in mis-assembly and/or mislocalization of endospore  
270 surface structures. Contrary to S-type Enas, close inspection of the WT and mutant  
271 endospores suggests that L-type Enas emanate from the surface of the exosporium rather  
272 than the spore body. The molecular identity of the L-type Ena, or the single or multiple  
273 terminal ruffles seen, respectively, in L- and S-type Enas was not determined in the present  
274 study.

275

## 276 **Phylogenetic distribution of the *ena1A-C* genes**

277 To investigate the occurrence of *ena1A-C* within the *B. cereus s.l.* group and other relevant  
278 species of the genus *Bacillus*, pairwise tBLASTn searches for homologs of Ena1A-C were  
279 performed on a database containing all available closed, curated *Bacillus* spp. genomes,  
280 with the addition of scaffolds for species for which closed genomes were lacking ( $n=735$ ,  
281 Table S3). Homologs and orthologs with high coverage ( $>90\%$ ) and high amino acid  
282 sequence identity ( $>80\%$ ) to Ena1A or Ena1B of *B. cereus* NVH 0075-95 were found in 48  
283 strains including 11 of 85 *B. cereus* strains, 13 of 119 *B. wiedmannii* strains, 14 of 14 *B.*  
284 *cytotoxicus* strains, one of one *B. luti* (100%) strain, three of six *B. mobilis* strains, three of 33  
285 *B. mycoides* strains, one of one *B. tropics* strain and both *B. paranthracis* strains analyzed. Of  
286 these strains, only 31 also carried a gene encoding a homolog with high sequence identity  
287 and coverage to Ena1C of *B. cereus* NVH 0075-95 (Figure 6). All investigated *B. cytotoxicus*  
288 genomes (14/14) encoded hypothetical Ena1A and Ena1B proteins, but only 12/14 encoded  
289 an Ena1C ortholog, which showed only a moderate amino acid conservation compared to  
290 the Ena1C of *B. cereus* NVH 0075-95 (mean 63.9% amino acid sequence identity) (Figure 6,  
291 Figure S5).

292

293 Upon searching for Ena1A-C homologs in *B. cereus* group genomes, a candidate orthologous  
294 gene cluster encoding hypothetical EnaA-C proteins was discovered. These three proteins  
295 had, respectively, an average of  $59.3\pm 0.9\%$ ,  $43.3\pm 1.6\%$  and  $53.9\pm 2.2\%$  amino acid sequence  
296 identity with Ena1A, Ena1B and Ena1C of *B. cereus* NVH0075-95, and shared gene synteny  
297 (Figure 6b). The orthologous *ena* gene cluster was named *ena2A-C*. Except for *B. subtilis*  
298 ( $n=127$ ) and *B. pseudomycoides* ( $n=8$ ), all genomes analyzed ( $n=735$ ) carried either *ena1*  
299 ( $n=48$ ) or the *ena2* ( $n=476$ ) gene cluster. *Ena1A-C* or the *ena2A-C* were never present  
300 simultaneously and no chimeric *ena1A-C/2A-C* clusters were discovered among the  
301 genomes analyzed (Figure 6). In addition to the main split between Ena1A-C and Ena2A-C in  
302 the protein trees, distinct sub-clusters were seen among Ena1A, Ena1B and, especially,  
303 Ena1C sequences (Figure S5). The Ena1A sequences separated into two main sub-clusters:  
304 one present in the majority of *B. cytotoxicus* strains and another found in *B. wiedmannii* and  
305 *B. cereus* strains (Figure S5A). More variation was evident for EnaB proteins: Ena1B

306 sequences formed two clusters; one containing *B. cereus* and *B. wiedmannii* isolates, and  
307 the other with *B. cytotoxicus* (Figure S5B). Also, a separate sub-cluster of Ena2B proteins  
308 was seen (Figure S5B), containing isolates of *B. mycooides*, *B. cereus*, *B. thuringiensis*, *B.*  
309 *pacificus*, and *B. wiedmannii* that shared around ~78% and ~48% sequence identity with the  
310 remainder of Ena2B and Ena1B, respectively. EnaC was the most variable of the three  
311 proteins: Ena1C formed a monophyletic clade containing isolates of *B. wiedmannii*, *B. cereus*,  
312 *B. anthracis*, *B. paranthracis*, *B. mobilis*, *B. tropicus*, and *B. luti*, but had considerable  
313 sequence variation in species and strains carrying *Ena2AB* as well as in subset of strains  
314 carrying *Ena1AB*.

315

316 The *ena2A-C* homo- or orthologs were much more common among *B. cereus* group strains  
317 than the *ena1A-C* genes; all investigated *B. toyonensis* ( $n=204$ ), *B. albus* ( $n=1$ ), *B.*  
318 *bombysepticus* ( $n=1$ ), *B. nitratireducens* ( $n=6$ ), *B. thuringiensis* ( $n=50$ ) genomes and in the  
319 majority of *B. cereus* (87%, 74/85), *B. wiedmannii* (105/119, 89.3%), *B. tropicus* (71%, 5/7, )  
320 and *B. mycooides* (91%, 30/33) had the Ena2A-C form of the protein (Figure 6). No *ena*  
321 orthologs were found in *B. subtilis* ( $n=127$ ) or *B. pseudomycooides* ( $n=8$ ) genomes or in any  
322 other genomes outside the *B. cereus* group except for three misclassified *Streptococcus*  
323 *pneumoniae* genomes (GCA\_001161325, GCA\_001170885, GCA\_001338635) and one  
324 misclassified *B. subtilis* genome (GCA\_004328845). These genomes and the *B. subtilis* were  
325 re-classified as *B. cereus* when re-analyzed with three different methods for taxonomic  
326 classification (Masthree, 7-lociMLST and Kraken, see Methods). The genomes of a few  
327 *Peaenibacillus* spp. strains had genes encoding hypothetical proteins with a low level of  
328 amino acid sequence similarity to Ena1A-C, and genes encoding hypothetical proteins with  
329 some similarity to Ena1A and Ena1B were also found in the genome of a *Cohnella abietis*  
330 strain (GCF\_004295585.1). These hits outside of *Bacillus* genus was in the DUF3992 domain  
331 of these genes, which is found in *Anaeromicrobium*, *Cochnella*, and of the order Bacillales.

332

333 A few genomes had deviations in the *ena*-gene clusters compared to other strains of their  
334 species. Two of three *B. mycooides* strains (GCF\_007673655 and GCF\_007677835.1) lacked  
335 the *ena1C* allele downstream of the *ena1A-B* operon (data not shown). However, potential  
336 *ena1c* orthologs encoding hypothetical proteins with 50% identity to Ena1C of *B. cereus* NVH  
337 0075-95 were found elsewhere in their genomes. One genome annotated as *B. cereus*

338 (strain Rock3-44 Assembly: GCA\_000161255.1) grouped with these strains of *B. mycooides*  
339 (Figure 6) and shared their *ena1A-C* distribution pattern with. *B. thuringiensis* usually carries  
340 *ena2* gene, but a genome annotated as *B. thuringiensis* (strain LM1212, GCF\_003546665)  
341 lacked all *ena* genes. This strain was nearly identical to the reference strain of *B. tropicus*,  
342 which also lacked both the *ena* gene clusters. One *B. toyonensis* strain AFS086269  
343 GCF\_002568845 also lacked all three genes, while the remainder of the 204 strains of *B.*  
344 *toyonensis* all had *ena2A-C*.

345

346

### 347 **Discussion**

348 Endospores formed by *Bacillus* and *Clostridium* species frequently carry surface-attached  
349 ribbon- or pilus-like appendages (Driks, 2007), the role of which has remained largely  
350 enigmatic due to the lack of molecular annotation of the pathways involved in their  
351 assembly. Half a century following their first observation (Hachisuka and Kuno, 1976;  
352 Hodgikiss, 1971), we employ high resolution *de novo* structure determination by cryoEM to  
353 structurally and genetically characterize the appendages found on *B. cereus* spores. We  
354 found that *B. cereus* Enas come in two main morphologies: 1) staggered or S-type Enas that  
355 are several micrometers long and emerge from the spore body and traverses the  
356 exosporium, and 2) smaller, less abundant ladder- or L-type Enas that appears to directly  
357 emerge from the exosporium surface. Our phylogenetic analyses of S-type fibers reveal Ena  
358 subunits belonging to a conserved family of proteins encompassing the domain of unknown  
359 function DUF3992.

360 Covalent bonding, and the highly compact jellyroll fold result in a high chemical and physical  
361 stability of the Ena fibers, withstanding desiccation, high temperature treatment, and  
362 exposure to proteases. The formation of linear filaments of multiple hundreds of subunits  
363 requires stable, long-lived subunit-subunit interactions with high flexibility to avoid that a  
364 dissociation of subunit-subunit complexes results in pilus breakage. This high stability and  
365 flexibility are likely to be adaptations to the extreme conditions that can be met by  
366 endospores in the environment or during the infectious cycle. Two molecular pathways are  
367 known to form surface fibers or “pili” in Gram-positive bacteria: 1) sortase-mediated pilus  
368 assembly, which encompasses the covalent linkage of pilus subunits by means of a

369 transpeptidation reaction catalyzed by sortases (Ton-That and Schneewind, 2004), and 2)  
370 Type IV pilus assembly, encompassing the non-covalent assembly of subunits through a  
371 coiled-coil interaction of a hydrophobic N-terminal helix (Melville and Craig, 2013). Sortase-  
372 mediated pili and Type IV pili are formed on vegetative cells, however, and to date, no  
373 evidence is available to suggest that these pathways are also responsible for the assembly of  
374 endospore appendages.

375 Until the present study, the only species for which the genetic identity and protein  
376 composition of spore appendages has been known, is the non-toxigenic environmental  
377 species *Clostridium taeniosporum*, which carry large (4.5  $\mu\text{m}$  long, 0.5  $\mu\text{m}$  wide and 30 nm  
378 thick) ribbon-like appendages, which are structurally distinct from those found in most  
379 other *Clostridium* and *Bacillus* species. *C. taeniosporum* lacks the exosporium layer and the  
380 appendages seem to be attached to another layer, of unknown composition, outside the  
381 coat (Walker et al., 2007). The *C. taeniosporum* endospore appendages consist of four major  
382 components, three of which have no known homologs in other species and an orthologs of  
383 the *B. subtilis* spore membrane protein SpoVM (Walker et al., 2007). The appendages on the  
384 surface of *C. taeniosporum* endospores, therefore, represent distinct type of fibers than  
385 those found on the surface of spores of species belonging to the *B. cereus* group.

386 Our structural studies uncover a novel class of pili, where subunits are organized into  
387 helically wound fibers, held together by lateral  $\beta$ -sheet augmentation inside the helical  
388 turns, and longitudinal disulfide cross-linking across helical turns. Covalent cross-linking in  
389 pilus assembly is known for sortase-mediated isopeptide bond formation seen in Gram-  
390 positive pili (Ton-That and Schneewind, 2004). In Ena, the cross-linking occurs through  
391 disulfide bonding of a conserved Cys-Cys motif in the N-terminal connector of a subunit *i*, to  
392 two single Cys residues in the core domain of the Ena subunits located at position *i*-9 and *i*-  
393 10 in the helical structure. As such, the N-terminal connectors form a covalent bridge across  
394 helical turns, as well as a branching interaction with two adjacent subunits in the preceding  
395 helical turn (i.e. *i*-9 and *i*-10). The use of N-terminal connectors or extensions is also seen in  
396 chaperone-usher pili and *Bacteroides* Type V pili, but these system employ a non-covalent  
397 fold complementation mechanism to attain long-lived subunit-subunit contacts, and lack a  
398 covalent stabilization (Sauer et al., 1999; Xu et al., 2016). Because in Ena the N-terminal  
399 connectors are attached to the Ena core domain via a flexible linker, the helical turns in Ena

400 fibers have a large pivoting freedom and ability to undergo longitudinal stretching. These  
401 interactions result in highly chemically stable fibers, yet with a large degree of flexibility.  
402 Whether the stretchiness and flexibility of Enas carry a functional importance remains  
403 unclear. Of note, in several chaperone-usher pili, a reversible spring-like stretching provided  
404 by helical unwinding and rewinding of the pili has been found important to withstand shear  
405 and pulling stresses exerted on adherent bacteria (Fallman et al., 2005; Miller et al., 2006).  
406 Possibly, the longitudinal stretching seen in Ena may serve a similar role.

407 Typical Ena filaments have, to the best of our knowledge, never been observed on the  
408 surface of vegetative *B. cereus* cells indicating that they are endospore-specific structures. In  
409 support of that assumption, RT-qPCR analysis NVH 0075-95 demonstrated increased *ena1A-C*  
410 transcript during sporulation, compared to vegetative cells. A transcriptional analysis of *B.*  
411 *thuringiensis* serovar *chinensis* CT-43 at 7 h, 9 h, 13 h (30 % of cells undergoing sporulation)  
412 and 22 hours of growth has previously been performed (Wang et al., 2013). It is difficult to  
413 directly compare expression levels of *ena1A, B* and *C* in *B. cereus* NVH 0075-95 with the  
414 expression level of *ena2A-C* in *B. thuringiensis* serovar *chinensis* CT-43 (CT43\_CH0783-785)  
415 since the expression of the latter strain was normalized by converting the number of reads  
416 per gene into RPKM (Reads Per Kilo bases per Million reads) and analyzed by DEGseq  
417 software package, while the present study determines the expression level of the *ena* genes  
418 relative to the house keeping gene *rpoB*. However, both studies indicate that *enaA* and *enaB*  
419 are only transcribed during sporulation. By searching a separate set of published  
420 transcriptomic profiling data we found that *ena2A-C* also are expressed in *B. anthracis*  
421 during sporulation (Bergman et al., 2006), although Enas have not previously been reported  
422 from *B. anthracis* spores.

423 Without knowledge on the function of Enas, we can only speculate about their  
424 biological role. The Enas of *B. cereus* group species resemble pili, which in Gram-negative  
425 and Gram-positive vegetative bacteria play roles in adherence to living surfaces (including  
426 other bacteria) and non-living surfaces, twitching motility, biofilm formation, DNA uptake  
427 (natural competence) and exchange (conjugation), secretion of exoproteins, electron  
428 transfer (Geobacter) and bacteriophage susceptibility (Lukaszczuk et al., 2019; Proft and  
429 Baker, 2009). Some bacteria express multiple types of pili that perform different functions.  
430 The most common function of pili-fibers is adherence to a diverse range of surfaces from

431 metal, glass, plastics rocks to tissues of plants, animals or humans. In pathogenic bacteria,  
432 pili often play a pivotal role in colonization of host tissues and function as important  
433 virulence determinants. Similarly, it has been shown that appendages, expressed on the  
434 surface of *C. sporogenes* endospores, facilitate their attachment to cultured fibroblast cells  
435 (Panessa-Warren et al., 2007). The Enas are, however, not likely to be involved in active  
436 motility or uptake/transport of DNA or proteins as they are energy demanding processes  
437 that are not likely to occur in the endospore's metabolically dormant state. Enas appear to  
438 be a widespread feature among spores of strains belonging to the *B. cereus* group (Figure 6),  
439 a group of closely related *Bacillus* species with a strong pathogenic potential (Ehling-Schulz  
440 et al., 2019). For most *B. cereus* group species, the ingestion, inhalation or the  
441 contamination of wounds with endospores forms a primary route of infection and disease  
442 onset. Enas cover much of the cell surface so that they can be reasonably expected to form  
443 an important contact region with the endospore environment and may play a role in the  
444 dissemination and virulence of *B. cereus* species. Our phylogenetic analysis shows a  
445 widespread occurrence of Enas in pathogenic *Bacilli*, and a striking absence in non-  
446 pathogenic species such as *B. subtilis*, a soil-dwelling species and gastrointestinal  
447 commensal that has functioned as the primary model system for studying endospores.  
448 Ankolekar *et al.*, showed that all of 47 food isolates of *B. cereus* produced endospores with  
449 appendages (Ankolekar and Labbe, 2010). Appendages were also found on spores of ten out  
450 of twelve food-borne, enterotoxigenic isolates of *B. thuringiensis*, which is closely related to  
451 *B. cereus*, and best known for its insecticidal activity (Ankolekar and Labbe, 2010).

452 The cryo-EM images of *ex vivo* fibers showed 2-3 nm wide fibers (ruffles) at the terminus of  
453 S- and L-type Enas. The ruffles resemble tip fibrilla of P-pili and type 1 seen in many Gram-  
454 negatives bacteria of the family Enterobacteriaceae (Proft and Baker, 2009). In Gram-  
455 negative pilus filaments, the tip fibrilla provides adhesion proteins with a flexible location to  
456 enhance the interaction with receptors on mucosal surfaces (Mulvey et al., 1998). No ruffles  
457 were observed on the *in vitro* assembled fibers suggesting that their formation require  
458 additional components than the Ena1B subunits.

459 We present the molecular identification of a novel class of spore-associated appendages or  
460 pili widespread in pathogenic *Bacilli*. Future molecular and infection studies will need to  
461 determine if and how Enas play a role in the virulence of spore-borne pathogenic *Bacilli*. The

462 advances in uncovering the genetic identity and the structural aspects of the Enas presented  
463 in this work now enable *in vitro* and *in vivo* molecular studies to tease out their biological  
464 role(s), and to gain insights into the basis for Ena heterogeneity amongst different *Bacillus*  
465 species.

466

#### 467 **Acknowledgements**

468 We thank Markus Fislage and Adam Schrofel at the VIB-VUB Facility for Bio Electron  
469 Cryogenic Microscopy (BECM) for assistance in data collection and Jan Haug Anonsen at  
470 NORCE research, Norway / Department of Biosciences, University of Oslo for assistance with  
471 sample analysis. We are grateful to Ute Kregel (UiO) for the mentorship of J.L. and  
472 feedback on the manuscript. This works was funded by VIB, EOS Excellence in Research  
473 Program by FWO through grant G0G0818N to HR, the NMBUs talent development program  
474 to MA and travel grants from The national graduate school in infection biology and  
475 antimicrobials (IBA) through NFR grant 249069 to J.L.

#### 476 **Author contributions**

477 B.P and M.S. performed TEM imaging, structural studies, and recombinant *ena1B*  
478 production and analysis. J.L. and T.L. produced endospores, performed TEM imaging,  
479 isolated Enas and conducted genetic studies. A-K.L. and O.B. conducted the phylogenetic  
480 analysis. H.R. and M.A. designed and supervised experiments, and wrote the paper, with  
481 contributions from all authors.

482

#### 483 **Figure legends**

484 **Figure 1. *B. cereus* endospores carry S and L-type Enas. (A, B)** negative stain TEM image of  
485 *B. cereus* NVH 0075-95 endospore, showing spore body (SB), exosporium (E), and endospore  
486 appendages (Ena), which emerge from the endospore individually or as fiber clusters  
487 (boxed). At the distal end, Enas terminate in a single or multiple thin ruffles (R). **(C, D)** Single  
488 fiber cryoTEM images and negative stain 2D class averages of S-type (C) and L-type Enas (D).



489 **(E)** Length distribution of S- and L-type Enas and number of Enas per endospore (inset),  
490 ( $n=1023$ , from 150 endospores, from 5 batches). See also [Figure S1](#).

491

492 **Figure 2. CryoTEM structure of S-type Enas. (A, B)** Representative 2D class average (A) and  
493 corresponding power spectrum (B) of *B. cereus* NVH 0075-95 S-type Enas viewed by  
494 cryoTEM. Bessel orders used to derive helical symmetry are indicated. **(C)** Reconstituted  
495 cryoEM electron potential map of *ex vivo* S-type Ena (3.2 Å resolution). **(D)** Side and top  
496 view of a single helical turn of the *de novo*-built 3D model of S-type Ena shown in ribbon  
497 representation and molecular surface. Ena subunits are labelled i to i-10. **(F)** Ribbon  
498 representation and topology diagram of the S-type Ena1B subunit (blue to red rainbow from  
499 N- to C-terminus), and its interaction with subunits i-9 (sand) and i-10 (green) through  
500 disulfide crosslinking.

501

502 **Figure 3. Ntc linkers give high flexibility and elasticity to S-type Enas. (A)** CryoTEM image of  
503 an isolated S-type Ena making a U-turn comprising just 19 helical turns (shown schematically  
504 in orange). **(B, C)** Cross-section and 3D cryoTEM electron potential map of the S-type Ena  
505 model, highlighting the longitudinal spacing between Ena1B jellyroll domains as a result of  
506 the Ntc linker (residues 12-17). **(D)** Negative stain 2D class averages of endospore-  
507 associated S-type Enas show variation in pitch and axial curvature.

508

509 **Figure 4. *ena* is bicistronic and expressed during sporulation. (A)** Chromosomal  
510 organization of the *ena* genes and primers used for transcript analysis (arrows). **(B)** Agarose  
511 gel electrophoresis (1%) analysis of PCR products using indicated primer pairs and cDNA  
512 made of mRNA isolated from NVH 0075-95 after 8 and 16 hours growth in liquid cultures or  
513 genomic DNA as control. Of note, the transcription of *ena1C* was surprisingly higher than  
514 *ena1A* and *ena1B*, which are components of the major appendages. **(C)** Transcription level  
515 of *ena1A* (x), *ena1B* (▲), *ena1C* (◻) and *dedA* (◻) relative to *rpoB* determined by RT-qPCR  
516 during 16 hours of growth of *B. cereus* strain NVH 0075-95. The dotted line represents the

517 bacterial growth measured by increase in OD<sub>600</sub>. Whiskers represent standard deviation of  
518 three independent experiments.

519

520 **Figure 5. Composition of S- and L-type Ena.** (A) Representative negative stain images of  
521 endospores of NVH 0075-95 mutants lacking *ena1A*, *ena1B*, *ena1A* and *B* or *ena1C*, as well  
522 as the *ena1B* mutant complemented with *ena1A-ena1B* from plasmid (pAB). Inset are 2D  
523 class averages of Enas observed on the respective mutants. (B) Length distribution and  
524 number of Enas found on WT and mutant NVH 0075-95 endospores. Statistics: pair-wise  
525 Mann-Whitney U tests against WT ( $n: \geq 18$  spores;  $n: \geq 50$  Enas; ns: not significant, \*  $p < 0.05$ ,  
526 \*\*  $p < 0.01$ , \*\*\*  $p < 0.001$  and \*\*\*\*  $p < 0.0001$ . ---: mean  $\pm$  s.d.)

527

528 **Figure 6. Ena is widespread in pathogenic Bacilli.** (A) Ena1 and Ena2 loci with average  
529 amino acid sequence identity indicated between the population of EnaA-C ortho- and  
530 homologs. Ena1C shows considerably more variation and is in *B. cytotoxicus* different from  
531 both Ena1C and Ena2C (see [Figure S5C](#)), while other genomes have *enaC* present at different  
532 loci (applies to two isolates of *B. mycooides*). (B) Distribution of *ena1/2A-C* among *Bacillus*  
533 species. Whole genome clustering of the *B. cereus s.l.* group and *B. subtilis* created by  
534 Mashtree (Katz et al., 2019; Ondov et al., 2016) and visualized in Microreact (Argimon et al.,  
535 2016). Rooted on *B. subtilis*. Traits for species (colored nodes), Bazinet clades and presence  
536 of *ena* are indicated on surrounding four rings in the following order from inner to outer:  
537 clade according to Bazinet 2017 (when available) (Bazinet, 2017) (see legend), and presence  
538 of *enaA*, *enaB* and *enaC* (for all three, *ena1*: teal, *ena2*: orange, different locus: cyan).  
539 When no homo- or ortholog was found, the ring is grey. Ena1A-C and Ena2A-C are defined  
540 as present when a homologous protein of the corresponding genome has high coverage  
541 (>90%) and >80% and 50-65% sequence identity, respectively, with Ena1A-C of the NMH  
542 0095/75 strain (see Table S4). Interactive tree accessible at  
543 <https://microreact.org/project/vn2oWw7zM3cwejEFNoRGWA/0024f86c>

544

## 545 METHODS

### 546 Culture of *B. cereus* and appendages extraction

547 For extraction of Enas the *B. cereus* strain NVH 0075-95 was plated on blood agar plates and  
548 incubated at 37 °C for 3 months. Upon maturation, the spores were resuspended and  
549 washed in milli-Q water three times (centrifugation 2,400 *g* at 4 °C). To get rid of various  
550 organic and inorganic debris, the pellet was then resuspended in 20% Nycodenz (Axis-  
551 Shield) and subjected to Nycodenz density gradient centrifugation where the gradient was  
552 composed of a mixture of 45% and 47% (w/v) Nycodenz in 1:1 v/v ratio. The pellet  
553 consisting only of the spore cells was then washed with 1 M NaCl and TE buffer (50 mM Tris-  
554 HCl; 0.5 mM EDTA) containing 0.1% SDS respectively. To detach the appendages, the  
555 washed spores were sonicated at 20k Hz  $\pm$  50 Hz and 50 watts (Vibra Cell VC50T; Sonic &  
556 Materials Inc.; U.S.) for 30 seconds on ice followed by centrifugation at 4500 *g* and  
557 appendages were collected in the supernatant. To further get rid of the residual  
558 components of spore and vegetative mother cells n-hexane was added and vigorously mixed  
559 with the supernatant in 1:2 v/v ratio. The mixture was then left to settle to allow phase  
560 separation of water and hexane. The hexane fraction containing the appendages was then  
561 collected and kept at 55 °C under pressured air for 1.5 hours to evaporate the hexane. The  
562 appendages were finally resuspended in mill-Q water for further cryo-EM sample  
563 preparation.

#### 564 **Recombinant expression, purification and *in vitro* assembly of Ena1B appendages**

565 A synthetic open reading frame encoding Ena1B was codon optimized for recombinant  
566 expression in *E. coli*, synthesized and cloned into pET28a expression vector at Twist  
567 biosciences (Table S2). The insert was designed to have a N-terminal 6X histidine tag on  
568 Ena1B along with a TEV protease cleavage site (ENLYFQG) in between. Large scale  
569 recombinant expression was carried out in the T7 Express lysY/lq *E. coli* strain from NEB. A  
570 single colony was inoculated into 20 mL of LB and grown at 37 °C with shaking at 150 rpm  
571 overnight for primary culture. Next morning 6 L of LB was inoculated with 20 mL/L of  
572 primary culture and grown at 37 °C with shaking until the OD<sub>600</sub> reached 0.8 after which  
573 protein expression was induced with 1 mM isopropyl  $\beta$ -D-1-thiogalactopyranoside (IPTG).  
574 The culture was incubated for a further 3 hours at 37 °C and harvested by centrifugation at  
575 5,000 rpm. The whole-cell pellet was resuspended in lysis buffer (20 mM potassium  
576 phosphate, 500 mM NaCl, 10 mM  $\beta$ -mercaptoethanol, 20 mM imidazole, pH 7.5) and  
577 sonicated on ice for lysis. The lysate was centrifuged to separate the soluble and insoluble

578 fractions by centrifugation at 18,000 rpm for 45 min in a JA-20 rotor from Beckman Coulter.  
579 The pellet was further dissolved in denaturing lysis buffer consisting 8M urea in lysis buffer.  
580 The dissolved pellet was then passed over a HisTrap HP column (GE Healthcare) and  
581 equilibrated with denaturing lysis buffer. The bound protein was eluted from the column  
582 with elution buffer (20 mM potassium phosphate, pH 7.5, 8 M urea, 250 mM imidazole) in a  
583 gradient mode (20-250 mM imidazole) at room temperature.

584 For *in vitro* Ena1B assembly, purified His-Ena1B in denaturing conditions was first  
585 dialyzed against a buffer containing 20 mM Hepes, pH 7.0, 50 mM NaCl overnight at 4 °C. To  
586 facilitate Ena1B self-assembly into S-type Ena filaments the 6xHis-tag was cleaved off by TEV  
587 protease. TEV protease along with 100 mM  $\beta$ -mercaptoethanol was then added in  
588 equimolar ratio and incubated for 2 hours at 37 °C. Removal of the 6xHis-tag led to the  
589 assembly of the *recEna1B* into long Ena-like filaments [Figure S2F](#).

590

591

## 592 **Ena treatment experiments to test its robustness**

593 *Ex vivo* Enas extracted from *B. cereus* strain NVH 0075-95 (see above) were resuspended in  
594 deionized water, autoclaved at 121 °C for 20 minutes to ensure inactivation of residual  
595 bacteria or spores, and subjected to treatment with buffer or as indicated below and shown  
596 in [Figure S1](#). To determine Ena integrity upon the various treatments, samples were imaged  
597 using negative stain TEM and Enas were boxed and subjected to 2D classification as  
598 described below. To test protease resistance, *ex vivo* Ena were subjected to 1 mg/mL Ready-  
599 to-use Proteinase K digestion (Thermo Scientific) for 4 hours at 37 °C and imaged by TEM. To  
600 study the effects of desiccation on the appendages, *ex vivo* Ena were vacuum dried at 43 °C  
601 using Savant DNA120 Speedvac Concentrator (Thermo scientific) run for 2 hours at a speed  
602 of 2k RPM.

603

## 604 **Negative-Stain Transmission Electron Microscopy (TEM)**

605 For visualization of spores and recombinantly expressed appendages by negative stain TEM,  
606 formvar/carbon coated copper grids with 400-hole mesh (Electron Microscopy Sciences)

607 were glow discharged (ELMO; Agar Scientific) with a plasma current of 4 mA at vacuum for  
608 45 seconds. 3  $\mu$ L of sample was applied on the grids and allowed to bind to the support film  
609 for 1 minute after which the excess liquid was blotted away with Whatman grade 1 filter  
610 paper. The grids were then washed three times using three 15  $\mu$ L drops of milli-Q followed  
611 by blotting of excess liquid. The washed grids were held in 15  $\mu$ L drops of 2% uranyl acetate  
612 three times for, respectively, 10 seconds, 2 seconds and 1 minute durations, with a blotting  
613 step in between each dip. Finally, the uranyl acetate coated grids were blotted until dry. The  
614 grids were then imaged using a 120 kV JEOL 1400 microscope equipped with LaB6 filament  
615 and TVIPS F416 CCD camera. 2D classes of the appendages were generated in RELION 3.0  
616 (Zivanov et al., 2018) as described below.

617

#### 618 **Preparation of cryo-TEM grids and cryo-EM data collection.**

619 QUANTIFOIL<sup>®</sup> holey Cu 400 mesh grids with 2  $\mu$ m holes and 1  $\mu$ m spacing were first glow  
620 discharged in vacuum using plasma current of 5 mA for 1 minute (ELMO; Agar Scientific). 3  
621  $\mu$ L of 0.6 mg /mL graphene oxide (GO) solution was applied onto the grid and incubated 1  
622 minute for absorption at room temperature. Extra GO was then blotted out and left for  
623 drying using a Whatman grade 1 filter paper. For cryo-plunging, 3  $\mu$ L of protein sample was  
624 applied on the GO coated grids at 100% humidity and room temperature in a Gatan CP3  
625 cryo-plunger. After 1 minute of absorption it was machine-blotted with Whatman grade 2  
626 filter paper for 5 seconds from both sides and plunge frozen into liquid ethane at 180 °K.  
627 Grids were then stored in liquid nitrogen until data collection. Two datasets were collected  
628 for *ex vivo* and *recEna1B* appendages with slight changes in the collection parameters. High  
629 resolution cryo-EM 2D micrograph movies were recorded on a JEOL Cryoarm300 microscope  
630 automated with energy filter and a K2 or K3 direct electron detector run in counting mode.  
631 For the *ex vivo* Ena, the microscope was equipped with a K2 summit detector and had the  
632 following settings: 300 keV, 100 mm aperture, 30 frames / image, 62.5 e<sup>-</sup>/Å<sup>2</sup>, 2.315 seconds  
633 exposure, and 0.82 Å/pxl. For the *recEna1B* dataset was recorded on a K3 detector, at a  
634 pixel size of 0.782 Å/pxl, and an exposure of 64.66 e<sup>-</sup>/Å<sup>2</sup> taken over 61 frames / image.

#### 635 **Image processing**

636 MOTIONCORR2 (Zheng et al., 2017) implemented in RELION 3.0 (Zivanov et al., 2018)  
637 was used to correct for beam-induced image motion and averaged 2D micrographs were  
638 generated. The motion-corrected micrographs were used to estimate the CTF parameters  
639 using CTFIND4.2 (Rohou and Grigorieff, 2015) integrated in RELION 3.0. Subsequent  
640 processing used RELION 3.0. and SPRING (Desfosses et al., 2014). For both the datasets, the  
641 coordinates of the appendages were boxed manually using *e2helixboxer* from the EMAN2  
642 package (Tang et al., 2007). Special care was taken to select micrographs with good ice and  
643 straight stretches of Ena filaments. The filaments were segmented into overlapping single-  
644 particle boxes of dimension 300 x 300 pxl with an inter-box distance of 21 Å. For the *ex vivo*  
645 Enas a total of 53,501 helical fragments was extracted from 580 micrographs with an  
646 average of 2 - 3 long filaments per micrograph. For the *recEna1B* filaments, 100,495 helical  
647 fragments were extracted from 3,000 micrographs with an average of 4 - 5 filaments per  
648 micrograph. To filter out bad particles multiples rounds of 2D classification were run in  
649 RELION 3.0. After several rounds of filtering, a dataset of 42,822 and 65,466 good particles  
650 of the *ex vivo* and *recEna1B* appendages were selected, respectively.

651 After running ~50 iterations of 2D classification well-resolved 2D class averages  
652 could be obtained. *segclassexam* of the SPRING package (Desfosses et al., 2014) was used to  
653 generate B-factor enhanced power spectrum of the 2D class averages. The generated  
654 power spectrum had an amplified signal-to-noise ratio with well resolved layer lines (Figure  
655 2B). To estimate crude helical parameters, coordinates and phases of the peaks in the layer  
656 lines were measured using the *segclasslayer* option in SPRING. Based on the measured  
657 distances and phases possible sets of Bessel orders were deduced, after which the  
658 calculated helical parameters were used in a helical reconstruction procedure in RELION (He  
659 and Scheres, 2017). A featureless cylinder of 110 Å diameter generated using  
660 *relion\_helix\_toolbox* was used as an initial model for 3D classification. Input rise and twist  
661 deduced from Fourier – Bessel indexing were varied in the range of 3.05 – 3.65 Å and 29 –  
662 35 degrees, respectively, with a sampling resolution of 0.1 Å and 1 degree between tested  
663 start values. So doing, several rounds of 3D classification were run until electron potential  
664 maps with good connectivity and recognizable secondary structure were obtained. The  
665 output translational information from the 3D classification was used to re-extract particles  
666 and 3D refinement was done taking a 25 Å low pass filtered map generated from the 3D

667 classification run. To improve the resolution of the EM maps multiple rounds of 3D  
668 refinement were run. To further improve the resolution Bayesian polishing was performed  
669 in RELION. Finally, a solvent mask covering the central 50% of the helix z-axis was generated  
670 in *maskcreate* and used for postprocessing and calculating the solvent-flattened Fourier  
671 shell correlation (FSC) curve in RELION. After two rounds of polishing, maps of 3.2 Å  
672 resolution according to the  $FSC_{0.143}$  gold-standard criterion as well as local resolution  
673 calculated in RELION were obtained (Figure S3A).

674

### 675 **Model building**

676 Prior to model building unfiltered maps for *recEna1B* calculated by Relion were masked  
677 down to three helical turns and used for cryo-EM density modification as implemented in  
678 ResolveCryoEM (Terwilliger et al., 2019) from the PHENIX package (Afonine et al., 2018),  
679 resulting in a map of 3.05 Å final resolution ( $FSC_{0.143}$  criterium) for *recEna1B*. At first the  
680 primary skeleton for a single asymmetric subunit from the density modified map was  
681 generated in Coot (Emsley et al., 2010). Primary sequence of *Ena1B* was manually threaded  
682 onto the asymmetric unit and fitted into the map taking into consideration the chemical  
683 properties of the residues. The SSM superpose tool in coot was used to place the additional  
684 protomers of the S-type *Ena* from a single subunit. The built model was then subjected to  
685 multiple rounds real space structural refinement in PHENIX, each residue was manually  
686 inspected after every round of refinement. Model validation was done in Molprobit (Davis  
687 et al., 2007) implemented in Phenix. All the visualizations and images for figures were  
688 generated in ChimeraX (Goddard et al., 2018), Chimera (Pettersen et al., 2004), or Pymol.

689

### 690 **Immuno-labelling of the Enas**

691 For antibody generation, *recEna1A* and *recEna1C* were cloned, expressed and purified according to  
692 the method described above for *recEna1B*. Aliquots of purified *recEna1A*, *recEna1B* and *recEna1C*  
693 were concentrated to 1 mg/mL in PBS for rabbit immunization (Davids Biotechnologie GmbH). For  
694 immunostaining EM imaging, 3 µL aliquots of purified *ex vivo* Enas were deposited on  
695 Formvr/Carbon grids (400 Mesh, Cu; Electron Microscopy Sciences), washed with 20 µL 1x PBS, and

696 incubated for 1 hour with 0.5% (w/v) BSA in 1x PBS. After additional washing with 1x PBS, separate  
697 grids were individually incubated for 2 hours at 37 °C with 1:1000 dilutions in PBS of anti-Ena1A,  
698 anti-Ena1B or anti-Ena1C sera, respectively. Following washing with 1x PBS, grids were incubated  
699 for 1 hour 37 °C with a 1:2000 dilution of a 10 nm gold-labelled goat anti-rabbit IgG (G7277; Sigma  
700 Aldrich), washed with 1x PBS, and negative stained and imaged on a 120 kV JEOL 1400 microscope  
701 as described above.

702

### 703 **Quantitative RT-PCR**

704 RT-qPCR experiments were performed on isolated mRNA from *B. cereus* cultures harvested  
705 from three independent Bacto media cultures (37 °C, 150 rpm) at 4, 8, 12 and 16 hours post-  
706 inoculation. RNA extraction, cDNA synthesis and RT-qPCR analysis was performed essentially  
707 as described before (Madslie et al., 2014), with the following changes: pre-heated (65 °C)  
708 TRIzol Reagent (Invitrogen) and bead beating 4 times for 2 minutes in a Mini-BeadBeater-8  
709 (BioSpec) with cooling on ice in between.

710 Each RT-qPCR of the RNA samples was performed in triplicate, no template was added in  
711 negative controls, and *rpoB* was used as internal control. Slopes of the standard curves and  
712 PCR efficiency (E) for each primer pair were estimated by amplifying serial dilutions of the  
713 cDNA template. For quantification of mRNA transcript levels, Ct (threshold cycle) values of  
714 the target genes and the internal control gene (*rpoB*) derived from the same sample in each  
715 RT-qPCR reaction were first transformed using the term  $E^{-Ct}$ . The expression levels of target  
716 genes were then normalized by dividing their transformed Ct-values by the corresponding  
717 values obtained for the internal control gene (Duodu et al., 2010; Madslie et al., 2014;  
718 Pfaffl, 2001). The amplification was conducted by using StepOne PCR software V.2.0  
719 (Applied Biosystems) with the following conditions: 50 °C for 2 minutes, 95 °C for 2 minutes,  
720 40 cycles of 15 seconds at 95 °C, 1 minute at 60 °C and 15 seconds at 95 °C. All primers used  
721 for RT-qPCR analyses are listed in [Table S2](#).

722 Regular PCR reactions were performed on cDNA to confirm that *ena1A* and *ena1B* were  
723 expressed as an operon using the primers 2180/2177 and 2176/2175 and DreamTaq DNA  
724 polymerase (Thermo Fisher) amplified in an Eppendorf Mastercycler using the following



725 program: 95°C for 2 minutes, 30 cycles of 95°C for 30 seconds, 54°C for 30 seconds, and  
726 72°C for 1 minute.

## 727 Construction of deletion mutants

728 The *B. cereus* strain NVH 0075-95 was used as background for gene deletion mutants. The  
729 *ena1B* gene was deleted in-frame by replacing the reading frames with ATGTAA (5′–3′)  
730 using a markerless gene replacement method (Janes and Stibitz, 2006) with minor  
731 modifications. To create the deletion mutants the regions upstream (primer A and B, [Table](#)  
732 [S2](#)) and downstream (primer C and D, [Table S2](#)) of the target *ena* genes were amplified by  
733 PCR. To allow assembly of the PCR fragments, primers B and C contained complementary  
734 overlapping sequences. An additional PCR step was then performed, using the upstream and  
735 downstream PCR fragments as template and the A and D primer pair ([Table S2](#)). All PCR  
736 reactions were conducted using an Eppendorf Mastercycler gradient and high fidelity  
737 AccuPrime Taq DNA Polymerase (ThermoFisher Scientific) according to the manufacturer's  
738 instructions. The final amplicons were cloned into the thermosensitive shuttle vector pMAD  
739 (Arnaud et al., 2004) containing an additional I-SceI site as previously described (Lindback et  
740 al., 2012). The pMAD-I-SceI plasmid constructs were passed through One Shot™ INV110 *E.*  
741 *coli* (ThermoFisher Scientific) to achieve unmethylated DNA to enhance the transformation  
742 efficiency in *B. cereus*. The unmethylated plasmid were introduced into *B. cereus* NVH 0075-  
743 95 by electroporation (Mahillon et al., 1989). After verification of transformants by PCR, the  
744 plasmid pBKJ233 (unmethylated), containing the gene for the I-SceI enzyme, was introduced  
745 into the transformant strains by electroporation. The I-SceI enzyme makes a double-  
746 stranded DNA break in the chromosomally integrated plasmid. Subsequently, homologous  
747 recombination events lead to excision of the integrated plasmid resulting in the desired  
748 genetic replacement. The gene deletions were verified by PCR amplification using primers A  
749 and D ([Table S2](#)) and DNA sequencing (Eurofins Genomics).

## 750 Search for orthologs and homologs of Ena1

751 Publicly available genomes of species belonging to the *Bacillus s.l.* group ([Table S3 and S4](#))  
752 was downloaded from NCBI RefSeq database ( $n=735$ , NCBI  
753 (<https://www.ncbi.nlm.nih.gov/refseq/>, [Table S1](#))). Except for strains of particular interest

754 due to phenotypic characteristics (GCA\_000171035.2\_ASM17103v2,  
755 GCA\_002952815.1\_ASM295281v1, GCF\_000290995.1\_Baci\_cere\_AND1407\_G13175) and  
756 species of which closed genomes were nonexistent or very scarce ( $n=158$ ), all assemblies  
757 included were closed and publicly available genomes from the curated database of NCBI  
758 RefSeq database. Assemblies were quality checked using QUAST (Gurevich et al., 2013), and  
759 only genomes of correct size (~4.9-6Mb) and a GC content of ~35% were included in the  
760 downstream analysis. Pairwise tBLASTn searches were performed (e-value 1e-10, max\_hspr  
761 1, default settings) to search for homo- and orthologs of the following query-protein  
762 sequences from strain NVH 0075-95: Ena1A, Ena1B, Ena1C (Table S3). The Ena1B protein  
763 sequences used as query originated from an inhouse amplicon sequenced product, while  
764 the Ena1A and Ena1C protein sequence queries originated from the assembly for strain NVH  
765 0075-95 (Accession number GCF\_001044825.1, protein KMP91698.1 and KMP91699.1,  
766 Table S5). We considered proteins orthologs or homologs when a subject protein matched  
767 the query protein with high coverage (>70%) and moderate sequence identity (>30%).

#### 768 **Comparative genomics of the ena-genes and proteins**

769 Phylogenetic trees of the aligned Ena1A-C proteins were constructed using approximately  
770 maximum likelihood by FastTree (Price et al., 2010) (default settings) for all hits resulting  
771 from the tBLASTn search. The amino acid sequences were aligned using mafft v.7.310 (Katoh  
772 et al., 2019), and approximately-maximum-likelihood phylogenetic trees of protein  
773 alignments were made using FastTree, using the JTT+CAT model (Price et al., 2010). All Trees  
774 were visualized in Microreact (Argimon et al., 2016) and the metadata of species, and  
775 presence and absence for Ena1A-C and Ena2A-C overlaid the figures.

#### 776 **References**

777 Afonine, P.V., Poon, B.K., Read, R.J., Sobolev, O.V., Terwilliger, T.C., Urzhumtsev, A., and  
778 Adams, P.D. (2018). Real-space refinement in PHENIX for cryo-EM and crystallography. *Acta*  
779 *Crystallogr D Struct Biol* 74, 531-544.  
780 Ankolekar, C., and Labbe, R.G. (2010). Physical characteristics of spores of food-associated  
781 isolates of the *Bacillus cereus* group. *Appl Environ Microbiol* 76, 982-984.

782 Argimon, S., Abudahab, K., Goater, R.J.E., Fedosejev, A., Bhai, J., Glasner, C., Feil, E.J.,  
783 Holden, M.T.G., Yeats, C.A., Grundmann, H., *et al.* (2016). Microreact: visualizing and sharing  
784 data for genomic epidemiology and phylogeography. *Microb Genom* 2, e000093.  
785 Arnaud, M., Chastanet, A., and Debarbouille, M. (2004). New vector for efficient allelic  
786 replacement in naturally nontransformable, low-GC-content, gram-positive bacteria. *Appl*  
787 *Environ Microbiol* 70, 6887-6891.  
788 Atrih, A., and Foster, S.J. (1999). The role of peptidoglycan structure and structural dynamics  
789 during endospore dormancy and germination. *Antonie Van Leeuwenhoek* 75, 299-307.  
790 Bazinet, A.L. (2017). Pan-genome and phylogeny of *Bacillus cereus sensu lato*. *BMC Evol Biol*  
791 17, 176.  
792 Bergman, N.H., Anderson, E.C., Swenson, E.E., Niemeyer, M.M., Miyoshi, A.D., and Hanna,  
793 P.C. (2006). Transcriptional profiling of the *Bacillus anthracis* life cycle in vitro and an implied  
794 model for regulation of spore formation. *J Bacteriol* 188, 6092-6100.  
795 Davis, I.W., Leaver-Fay, A., Chen, V.B., Block, J.N., Kapral, G.J., Wang, X., Murray, L.W.,  
796 Arendall, W.B., 3rd, Snoeyink, J., Richardson, J.S., *et al.* (2007). MolProbity: all-atom contacts  
797 and structure validation for proteins and nucleic acids. *Nucleic Acids Res* 35, W375-383.  
798 Desfosses, A., Ciuffa, R., Gutsche, I., and Sachse, C. (2014). SPRING - an image processing  
799 package for single-particle based helical reconstruction from electron cryomicrographs. *J*  
800 *Struct Biol* 185, 15-26.  
801 DesRosier, J.P., and Lara, J.C. (1981). Isolation and properties of pili from spores of *Bacillus*  
802 *cereus*. *J Bacteriol* 145, 613-619.  
803 Driks, A. (2007). Surface appendages of bacterial spores. *Mol Microbiol* 63, 623-625.  
804 Duodu, S., Holst-Jensen, A., Skjerdal, T., Cappelletti, J.M., Pilet, M.F., and Loncarevic, S.  
805 (2010). Influence of storage temperature on gene expression and virulence potential of  
806 *Listeria monocytogenes* strains grown in a salmon matrix. *Food Microbiol* 27, 795-801.  
807 Ehling-Schulz, M., Lereclus, D., and Koehler, T.M. (2019). The *Bacillus cereus* Group: *Bacillus*  
808 *Species with Pathogenic Potential*. *Microbiol Spectr* 7.  
809 Emsley, P., Lohkamp, B., Scott, W.G., and Cowtan, K. (2010). Features and development of  
810 Coot. *Acta crystallographica Section D, Biological crystallography* 66, 486-501.  
811 Fallman, E., Schedin, S., Jass, J., Uhlin, B.E., and Axner, O. (2005). The unfolding of the P pili  
812 quaternary structure by stretching is reversible, not plastic. *EMBO Rep* 6, 52-56.

813 Gerhardt, P., and Ribi, E. (1964). Ultrastructure of the Exosporium Enveloping Spores of  
814 *Bacillus Cereus*. *Journal of bacteriology* *88*, 1774-1789.

815 Goddard, T.D., Huang, C.C., Meng, E.C., Pettersen, E.F., Couch, G.S., Morris, J.H., and Ferrin,  
816 T.E. (2018). UCSF ChimeraX: Meeting modern challenges in visualization and analysis.  
817 *Protein Sci* *27*, 14-25.

818 Gurevich, A., Saveliev, V., Vyahhi, N., and Tesler, G. (2013). QUASt: quality assessment tool  
819 for genome assemblies. *Bioinformatics* *29*, 1072-1075.

820 Hachisuka, Y., and Kuno, T. (1976). Filamentous appendages of *Bacillus cereus* spores. *Jpn J*  
821 *Microbiol* *20*, 555-558.

822 He, S., and Scheres, S.H.W. (2017). Helical reconstruction in RELION. *J Struct Biol* *198*, 163-  
823 176.

824 Hodgikiss, W. (1971). Filamentous appendages on the spores and exosporium of certain  
825 *Bacillus* species. In *Spore research*, A.N. Barker, G.W. Gould, and J. Wolf, eds. (London and  
826 New York: Academic Press), pp. 211-218.

827 Janes, B.K., and Stibitz, S. (2006). Routine markerless gene replacement in *Bacillus anthracis*.  
828 *Infect Immun* *74*, 1949-1953.

829 Katoh, K., Rozewicki, J., and Yamada, K.D. (2019). MAFFT online service: multiple sequence  
830 alignment, interactive sequence choice and visualization. *Brief Bioinform* *20*, 1160-1166.

831 Katz, L.S., Griswold, T., Morrison, S.S., Caravas, J.A., Zhang, S., C., d.B.H., Deng, X., and  
832 Carleton, A. (2019). Mashtree: a rapid comparison of whole genome sequence  
833 files. *Journal of Open Source Software* *4*.

834 Lindback, T., Mols, M., Basset, C., Granum, P.E., Kuipers, O.P., and Kovacs, A.T. (2012). CodY,  
835 a pleiotropic regulator, influences multicellular behaviour and efficient production of  
836 virulence factors in *Bacillus cereus*. *Environ Microbiol* *14*, 2233-2246.

837 Lukaszczyk, M., Pradhan, B., and Remaut, H. (2019). The Biosynthesis and Structures of  
838 Bacterial Pili. *Subcell Biochem* *92*, 369-413.

839 Madslie, E.H., Granum, P.E., Blatny, J.M., and Lindback, T. (2014). L-alanine-induced  
840 germination in *Bacillus licheniformis* -the impact of native *gerA* sequences. *BMC Microbiol*  
841 *14*, 101.

842 Mahillon, J., Chungjatupornchai, W., Decock, J., Dierickx, S., Michiels, F., Peferoen, M., and  
843 Joos, H. (1989). Transformation of *Bacillus thuringiensis* by electroporation. *FEMS*  
844 *Microbiology Letters* *60*, 205-210.

845 Mandlik, A., Swierczynski, A., Das, A., and Ton-That, H. (2008). Pili in Gram-positive bacteria:  
846 assembly, involvement in colonization and biofilm development. *Trends Microbiol* *16*, 33-  
847 40.

848 Melville, S., and Craig, L. (2013). Type IV pili in Gram-positive bacteria. *Microbiol Mol Biol*  
849 *Rev* *77*, 323-341.

850 Miller, E., Garcia, T., Hultgren, S., and Oberhauser, A.F. (2006). The mechanical properties of  
851 *E. coli* type 1 pili measured by atomic force microscopy techniques. *Biophys J* *91*, 3848-3856.

852 Mulvey, M.A., Lopez-Boado, Y.S., Wilson, C.L., Roth, R., Parks, W.C., Heuser, J., and Hultgren,  
853 S.J. (1998). Induction and evasion of host defenses by type 1-piliated uropathogenic  
854 *Escherichia coli*. *Science* *282*, 1494-1497.

855 Ondov, B.D., Treangen, T.J., Melsted, P., Mallonee, A.B., Bergman, N.H., Koren, S., and  
856 Phillippy, A.M. (2016). Mash: fast genome and metagenome distance estimation using  
857 MinHash. *Genome Biol* *17*, 132.

858 Panessa-Warren, B.J., Tortora, G.T., and Warren, J.B. (2007). High resolution FESEM and  
859 TEM reveal bacterial spore attachment. *Microsc Microanal* *13*, 251-266.

860 Pettersen, E.F., Goddard, T.D., Huang, C.C., Couch, G.S., Greenblatt, D.M., Meng, E.C., and  
861 Ferrin, T.E. (2004). UCSF Chimera--a visualization system for exploratory research and  
862 analysis. *J Comput Chem* *25*, 1605-1612.

863 Pfaffl, M.W. (2001). A new mathematical model for relative quantification in real-time RT-  
864 PCR. *Nucleic Acids Res* *29*, e45.

865 Price, M.N., Dehal, P.S., and Arkin, A.P. (2010). FastTree 2--approximately maximum-  
866 likelihood trees for large alignments. *PLoS One* *5*, e9490.

867 Proft, T., and Baker, E.N. (2009). Pili in Gram-negative and Gram-positive bacteria -  
868 structure, assembly and their role in disease. *Cell Mol Life Sci* *66*, 613-635.

869 Remaut, H., and Waksman, G. (2006). Protein-protein interaction through beta-strand  
870 addition. *Trends Biochem Sci* *31*, 436-444.

871 Richardson, J.S. (1981). The anatomy and taxonomy of protein structure. *Adv Protein Chem*  
872 *34*, 167-339.

- 873 Rode, L.J., Pope, L., Filip, C., and Smith, L.D. (1971). Spore appendages and taxonomy of  
874 *Clostridium sordellii*. *Journal of bacteriology* *108*, 1384-1389.
- 875 Rohou, A., and Grigorieff, N. (2015). CTFIND4: Fast and accurate defocus estimation from  
876 electron micrographs. *J Struct Biol* *192*, 216-221.
- 877 Sauer, F.G., Futterer, K., Pinkner, J.S., Dodson, K.W., Hultgren, S.J., and Waksman, G. (1999).  
878 Structural basis of chaperone function and pilus biogenesis. *Science* *285*, 1058-1061.
- 879 Setlow, P. (2014). Germination of spores of *Bacillus* species: what we know and do not  
880 know. *Journal of bacteriology* *196*, 1297-1305.
- 881 Smirnova, T.A., Zubasheva, M.V., Shevliagina, N.V., Nikolaenko, M.A., and Azizbekian, R.R.  
882 (2013). [Electron microscopy of the surfaces of bacillary spores]. *Mikrobiologiya* *82*, 698-706.
- 883 Stewart, G.C. (2015). The Exosporium Layer of Bacterial Spores: a Connection to the  
884 Environment and the Infected Host. *Microbiol Mol Biol Rev* *79*, 437-457.
- 885 Tang, G., Peng, L., Baldwin, P.R., Mann, D.S., Jiang, W., Rees, I., and Ludtke, S.J. (2007).  
886 EMAN2: an extensible image processing suite for electron microscopy. *J Struct Biol* *157*, 38-  
887 46.
- 888 Terwilliger, T.C., Ludtke, S.J., Read, R.J., Adams, P.D., and Afonine, P.V. (2019). Improvement  
889 of cryo-EM maps by density modification. *bioRxiv*.
- 890 Ton-That, H., and Schneewind, O. (2004). Assembly of pili in Gram-positive bacteria. *Trends*  
891 *Microbiol* *12*, 228-234.
- 892 Walker, J.R., Gnanam, A.J., Blinkova, A.L., Hermandson, M.J., Karymov, M.A., Lyubchenko,  
893 Y.L., Graves, P.R., Haystead, T.A., and Linse, K.D. (2007). *Clostridium taeniosporum* spore  
894 ribbon-like appendage structure, composition and genes. *Mol Microbiol* *63*, 629-643.
- 895 Wang, J., Mei, H., Zheng, C., Qian, H., Cui, C., Fu, Y., Su, J., Liu, Z., Yu, Z., and He, J. (2013).  
896 The metabolic regulation of sporulation and parasporal crystal formation in *Bacillus*  
897 *thuringiensis* revealed by transcriptomics and proteomics. *Mol Cell Proteomics* *12*, 1363-  
898 1376.
- 899 Xu, Q., Shoji, M., Shibata, S., Naito, M., Sato, K., Elsliger, M.A., Grant, J.C., Axelrod, H.L., Chiu,  
900 H.J., Farr, C.L., *et al.* (2016). A Distinct Type of Pilus from the Human Microbiome. *Cell* *165*,  
901 690-703.
- 902 Zheng, S.Q., Palovcak, E., Armache, J.P., Verba, K.A., Cheng, Y., and Agard, D.A. (2017).  
903 MotionCor2: anisotropic correction of beam-induced motion for improved cryo-electron  
904 microscopy. *Nat Methods* *14*, 331-332.

905 Zivanov, J., Nakane, T., Forsberg, B.O., Kimanius, D., Hagen, W.J., Lindahl, E., and Scheres,  
906 S.H. (2018). New tools for automated high-resolution cryo-EM structure determination in  
907 RELION-3. *Elife* 7.

908

Figure 1

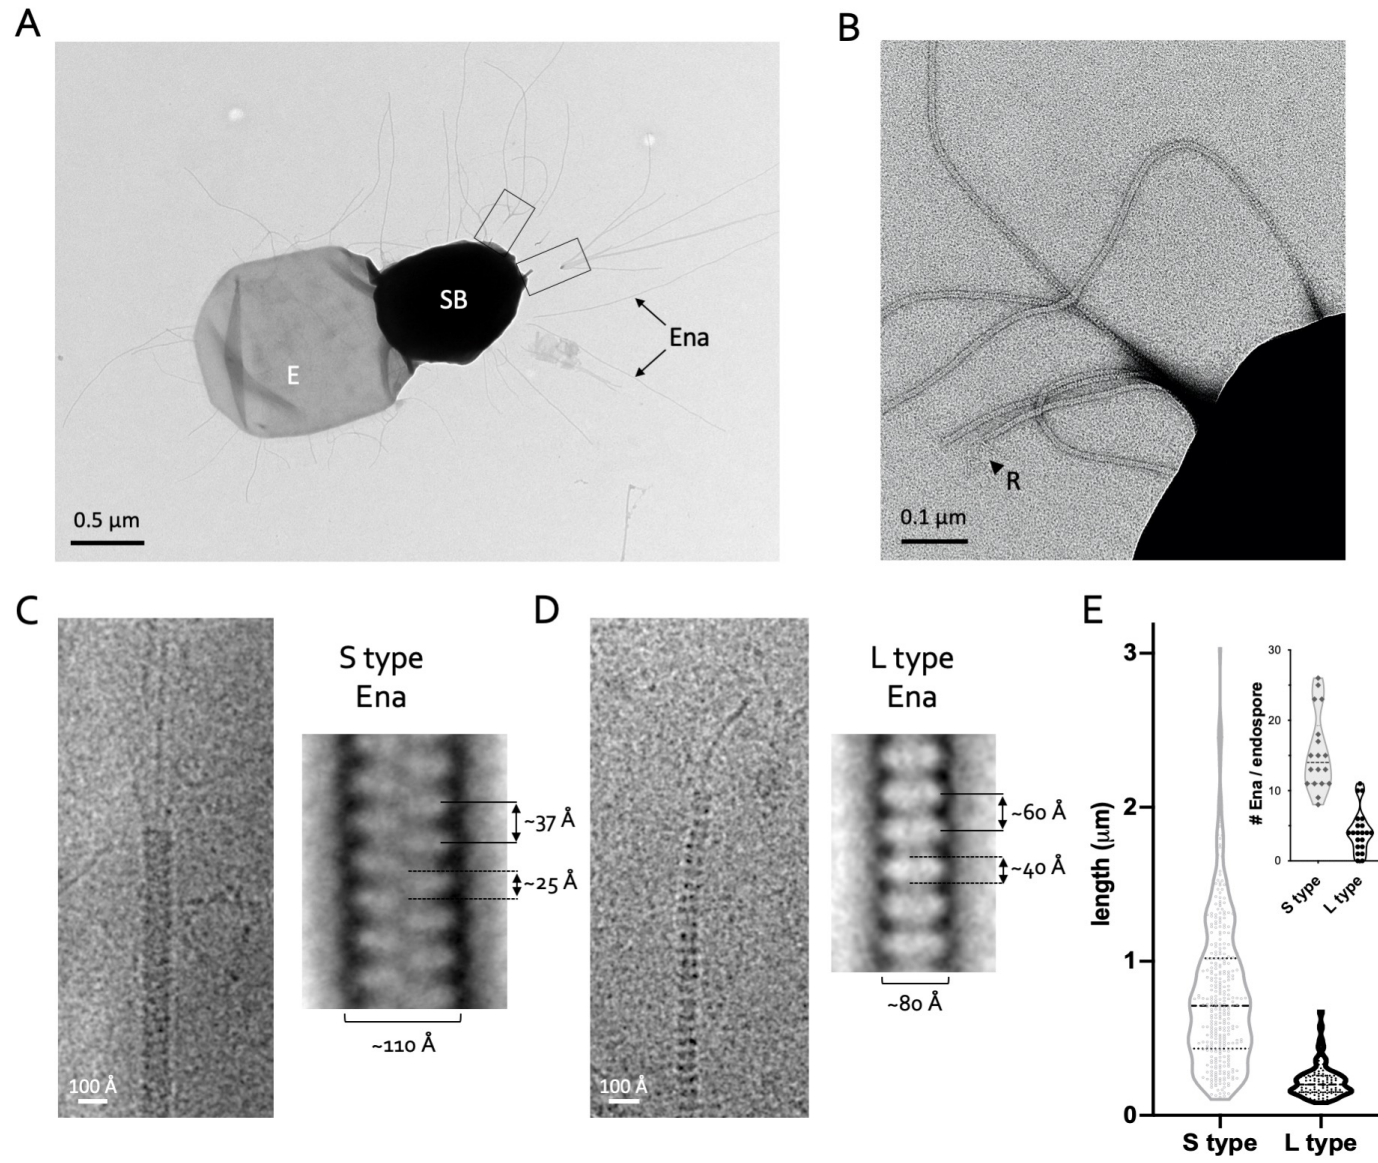



Figure 2

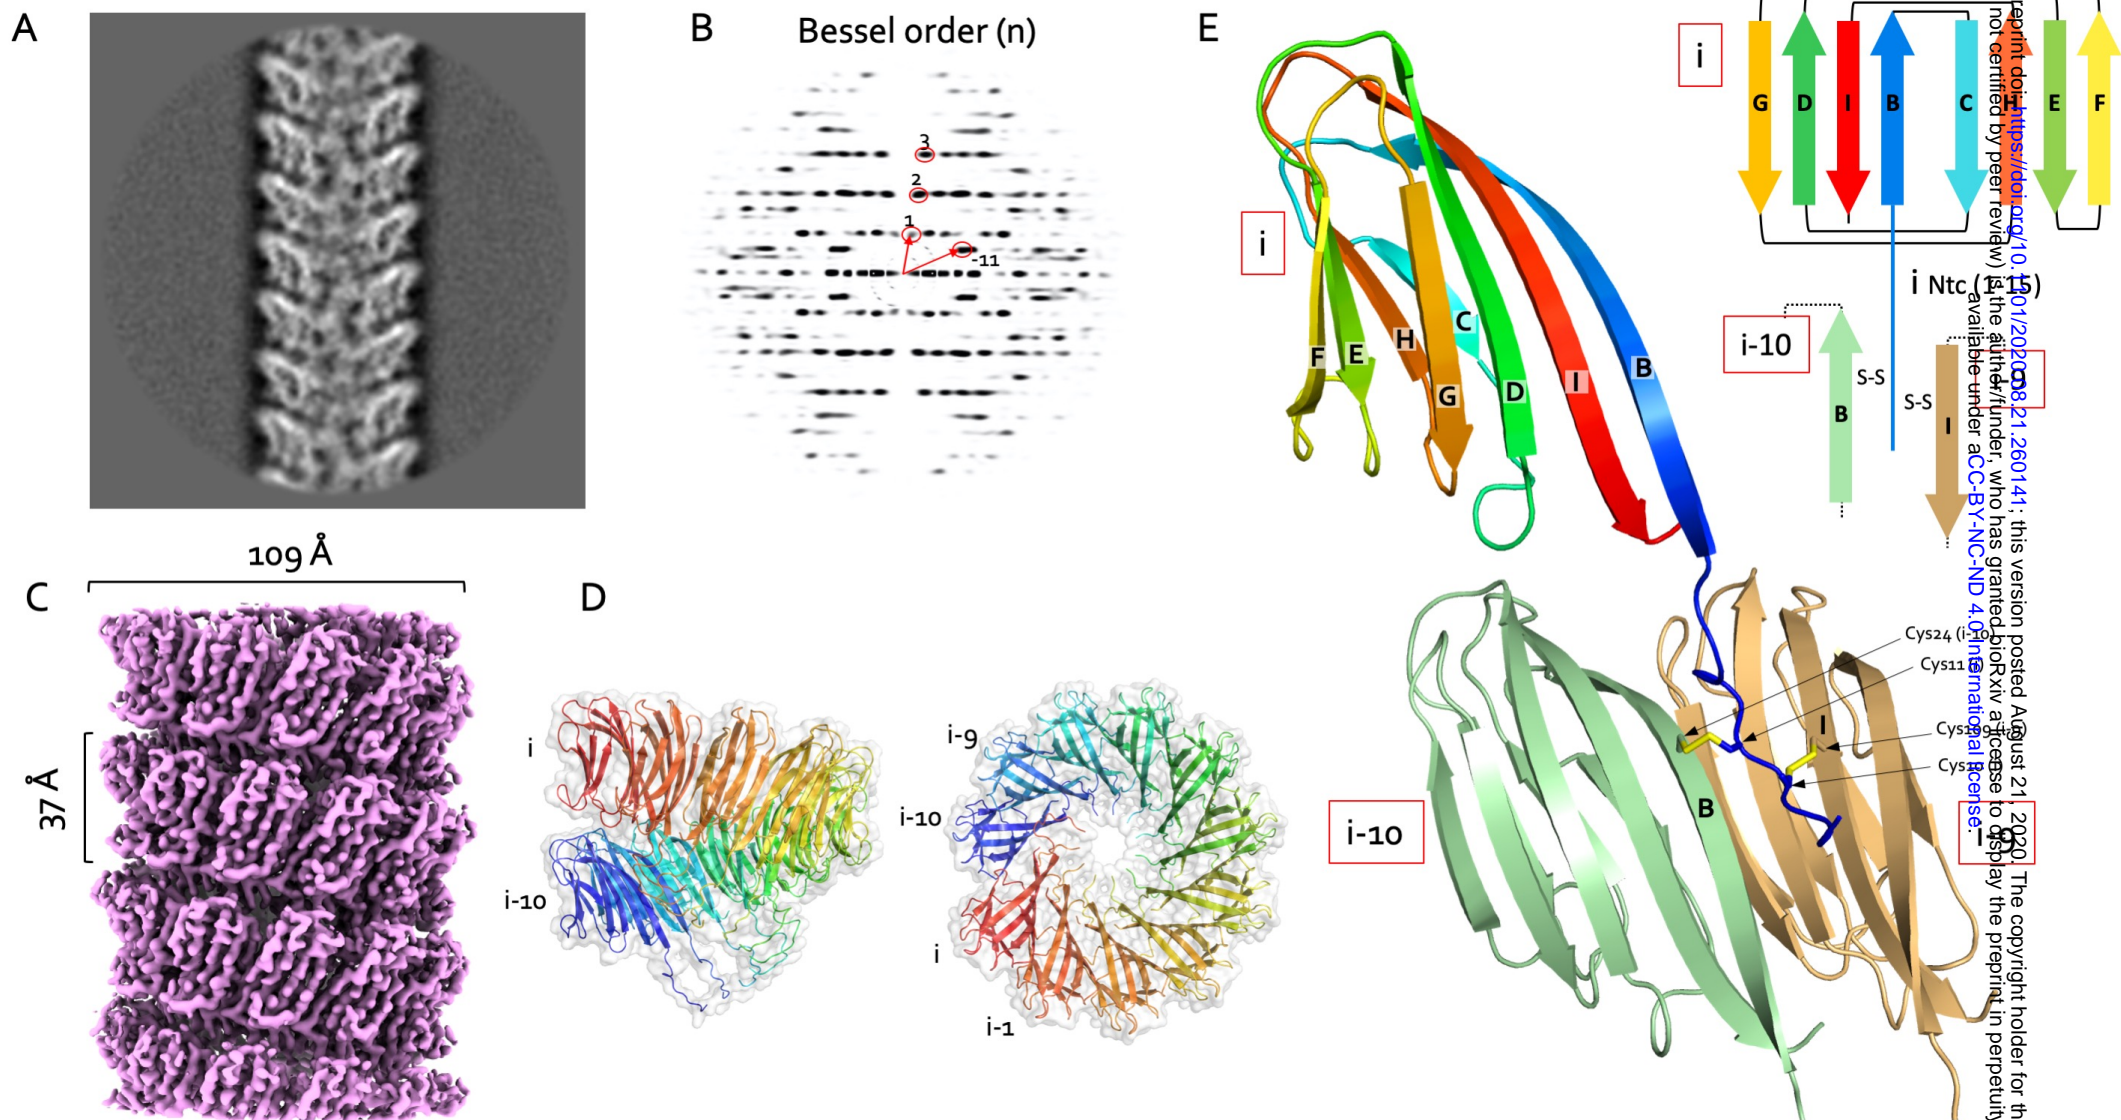

Figure 3

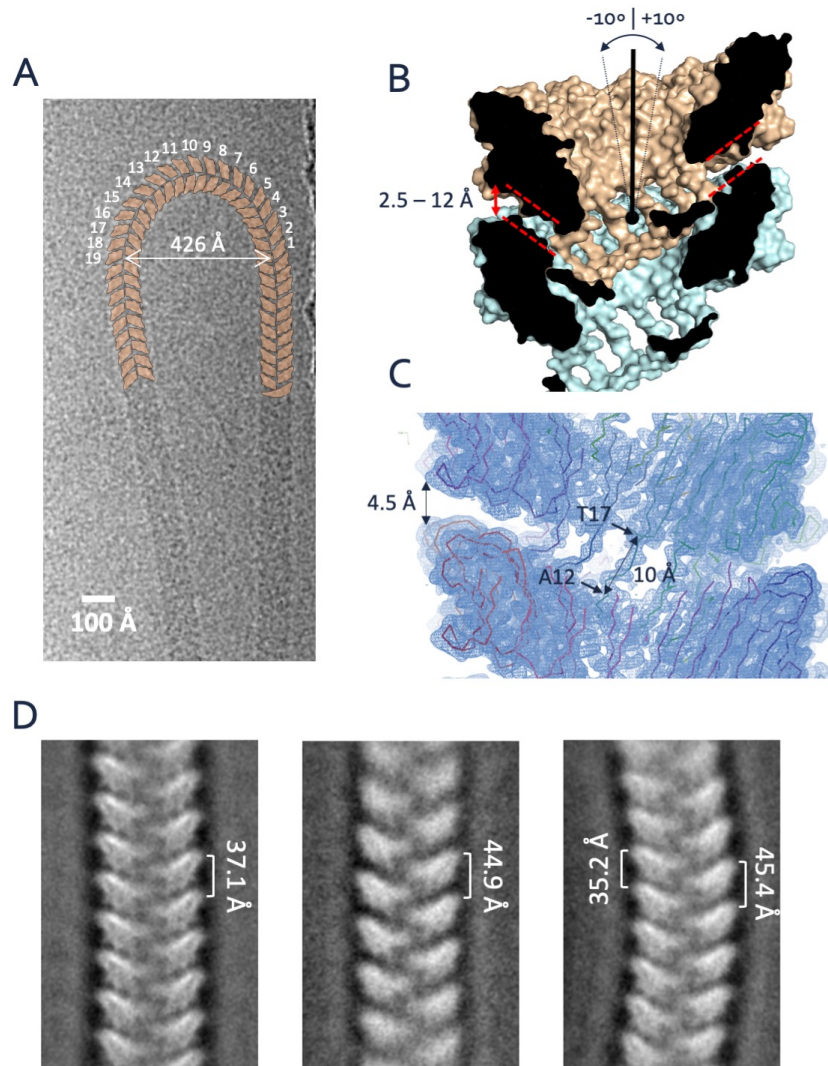

Figure 4

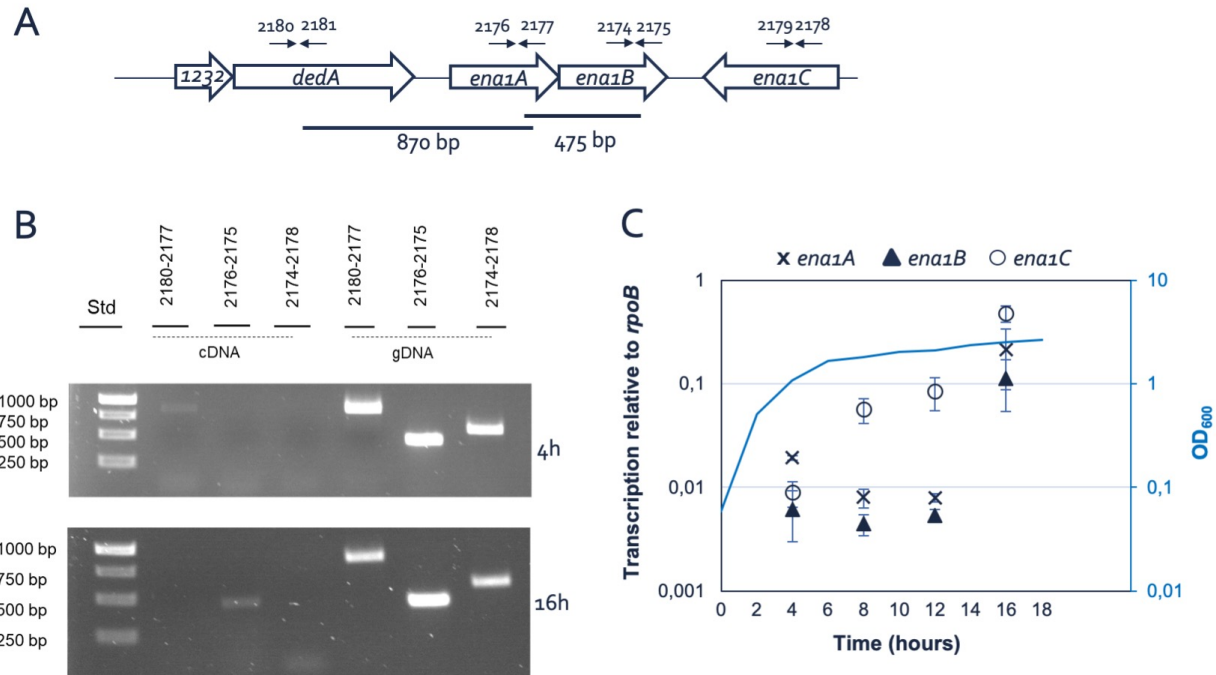



Figure 5

A

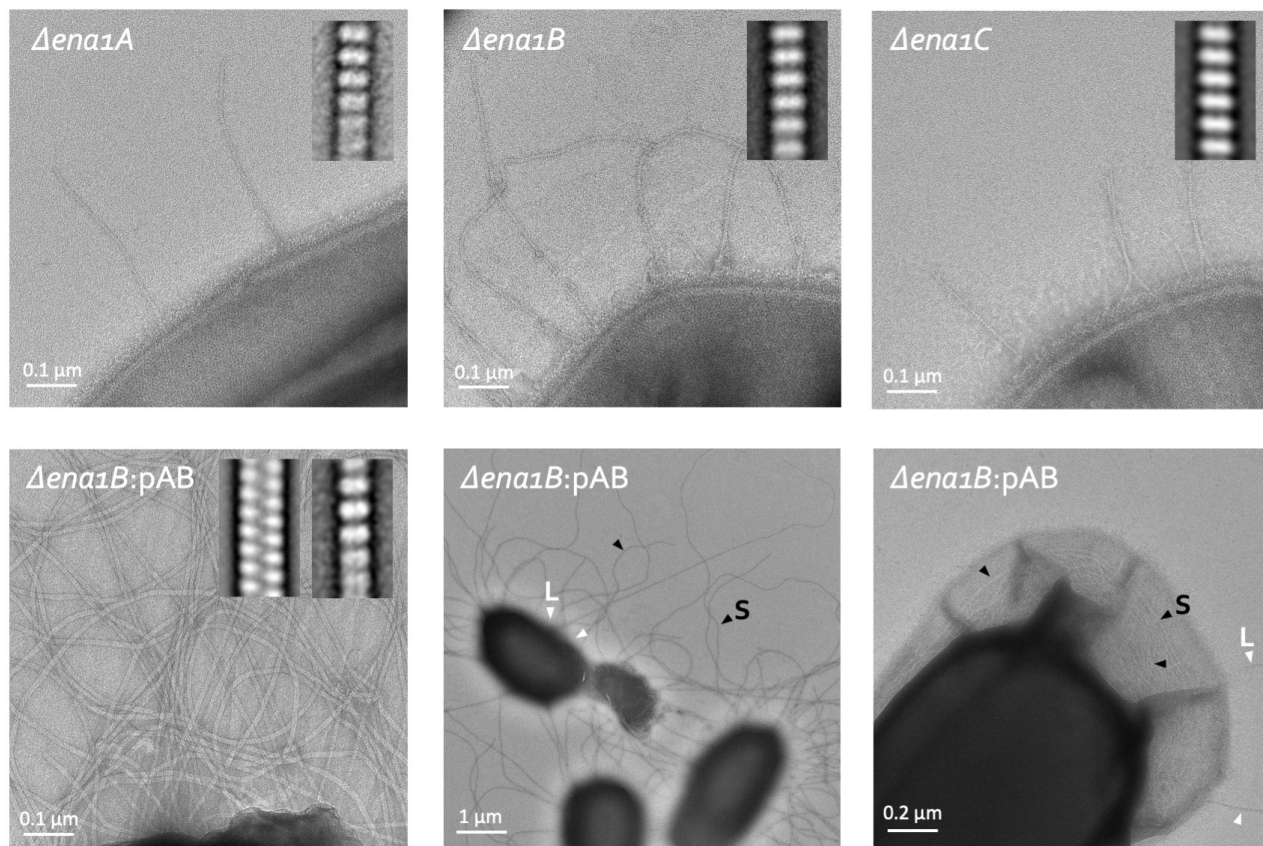

B

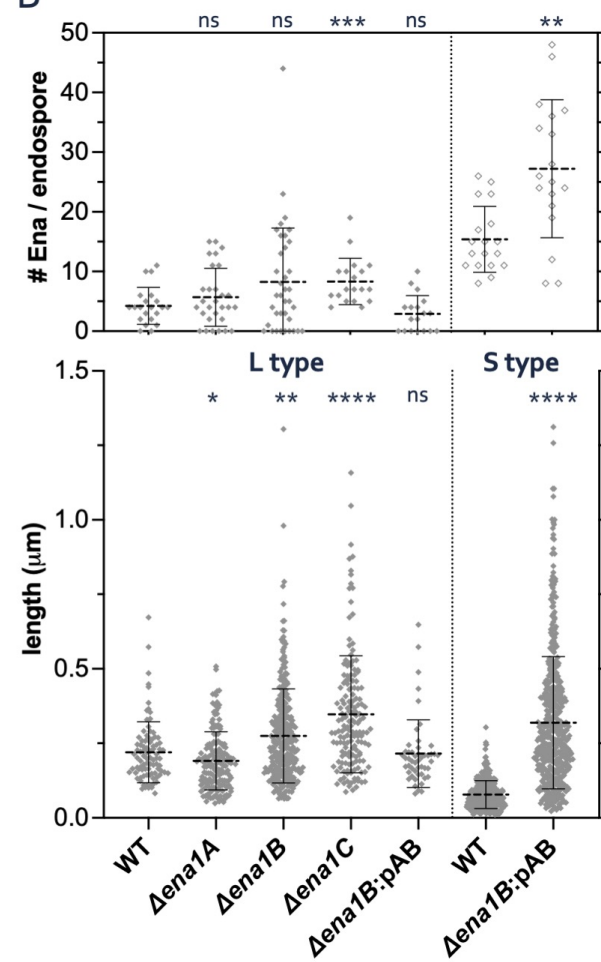

Figure 6

A

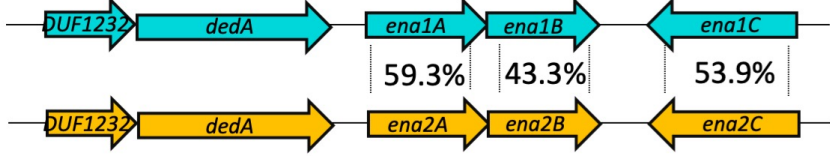

B

Species

- |                                                                  |                                                                 |
|------------------------------------------------------------------|-----------------------------------------------------------------|
| <span style="color: #4682B4;">●</span> <i>B. albus</i>           | <span style="color: #FFD700;">●</span> <i>B. pacificus</i>      |
| <span style="color: #FFFF00;">●</span> <i>B. anthracis</i>       | <span style="color: #ADD8E6;">●</span> <i>B. paramycoides</i>   |
| <span style="color: #9370DB;">●</span> <i>B. bombysepticus</i>   | <span style="color: #00008B;">●</span> <i>B. paranthracis</i>   |
| <span style="color: #DC143C;">●</span> <i>B. cereus</i>          | <span style="color: #90EE90;">●</span> <i>B. proteolyticus</i>  |
| <span style="color: #4682B4;">●</span> <i>B. cytotoxicus</i>     | <span style="color: #008000;">●</span> <i>B. pseudomycoides</i> |
| <span style="color: #FF8C00;">●</span> <i>B. gaemokensis</i>     | <span style="color: #F08080;">●</span> <i>B. subtilis</i>       |
| <span style="color: #90EE90;">●</span> <i>B. luti</i>            | <span style="color: #DC143C;">●</span> <i>B. thuringiensis</i>  |
| <span style="color: #FFB6C1;">●</span> <i>B. manliponensis</i>   | <span style="color: #FFA07A;">●</span> <i>B. toyonensis</i>     |
| <span style="color: #A9A9A9;">●</span> <i>B. mobilis</i>         | <span style="color: #FF4500;">●</span> <i>B. tropicus</i>       |
| <span style="color: #800080;">●</span> <i>B. mycoides</i>        | <span style="color: #9370DB;">●</span> <i>B. wiedmannii</i>     |
| <span style="color: #90EE90;">●</span> <i>B. nitratireducens</i> |                                                                 |

Clade

- |                                          |
|------------------------------------------|
| <span style="color: #4682B4;">■</span> - |
| <span style="color: #FFFF00;">■</span> 1 |
| <span style="color: #9370DB;">■</span> 2 |
| <span style="color: #DC143C;">■</span> 3 |

Ena isoform

- |                                               |
|-----------------------------------------------|
| <span style="color: #008080;">■</span> Ena1   |
| <span style="color: #FF8C00;">■</span> Ena2   |
| <span style="color: #A9A9A9;">■</span> absent |

0.055

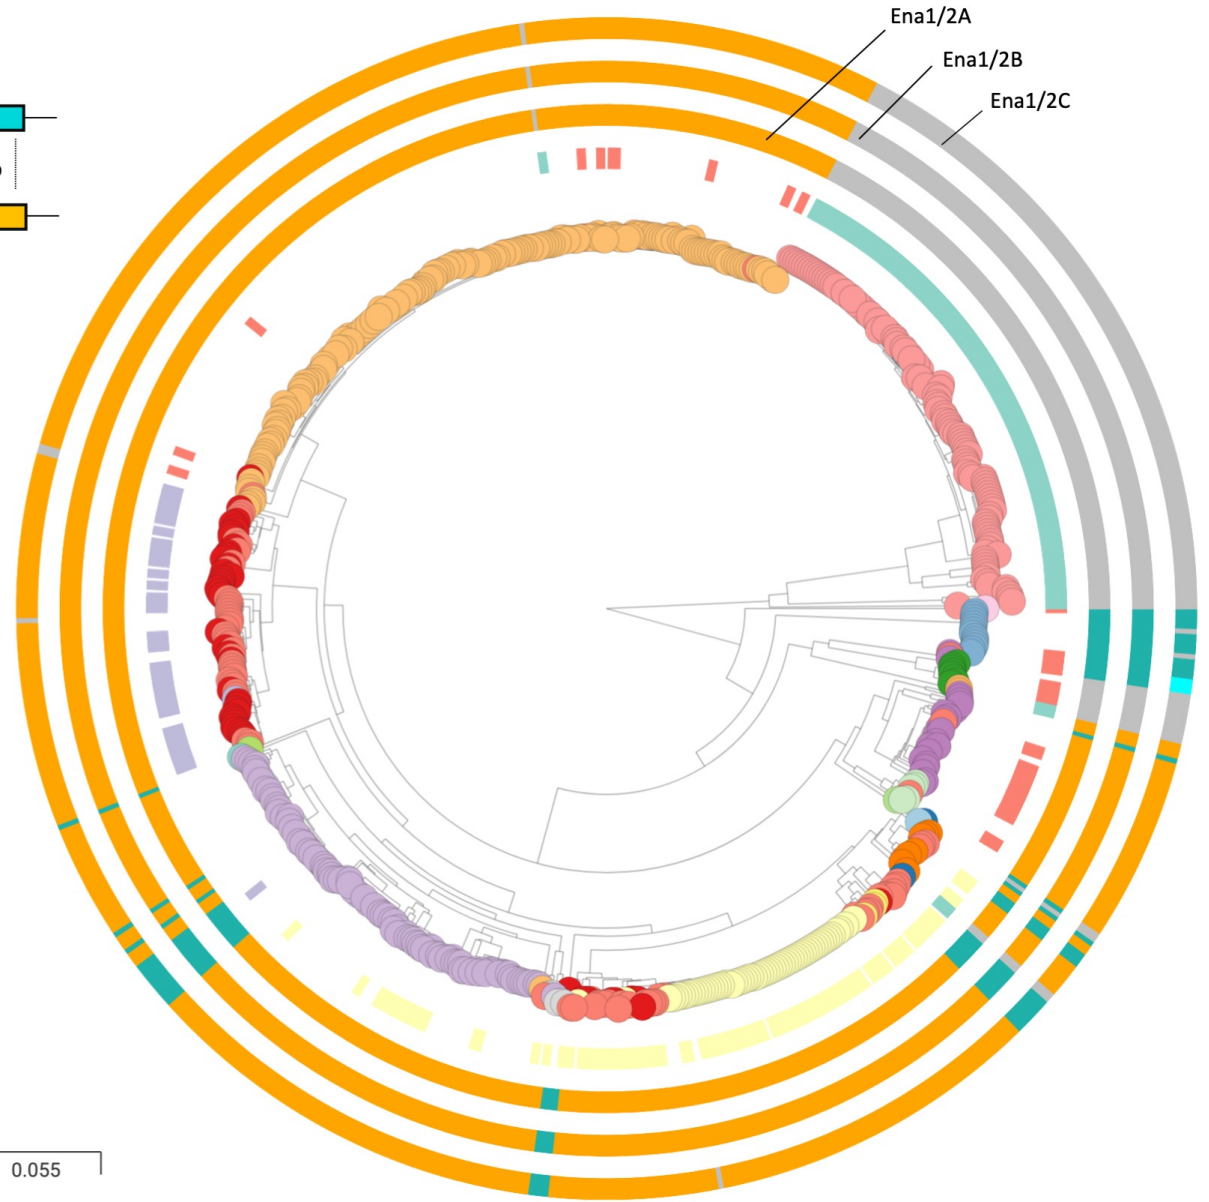

Source: https://www.biorxiv.org/content/biorxiv/early/2020/08/21/2020.08.21.260141.full.pdf
